# Supplementary material for: A pilot study of rapid benchtop sequencing of Staphylococcus aureus and Clostridium difficile for outbreak detection and surveillance
Source: PubMed Central journal article supplement — BMJ Open. 2012 Jun 6;2(3):e001124. doi: 10.1136/bmjopen-2012-001124 (PMC3378946; doi:10.1136/bmjopen-2012-001124), 2012-06-06
Supplement: bmjopen-2012-001124-s1.pdf [file bmjopen-2012-001124-s1.pdf]

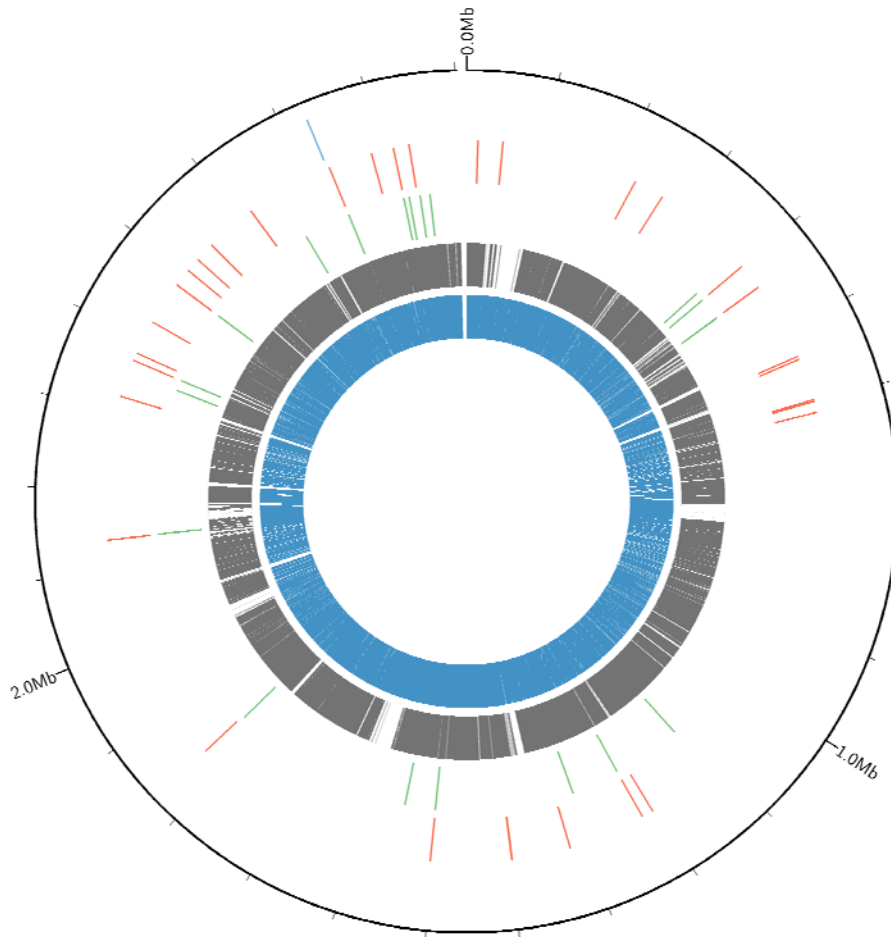

**Supplementary Figure 1. Location of variable sites in MRSA cluster 2.**

Circular plot of *S. aureus* genome. From inner ring to outer: inner ring (blue) showing coding regions of the MRSA252 reference genome; (grey) regions of MRSA252 called in case Q; (green) location of observed variable sites in case W relative to case Q, each variable site shown as a line; (red) location of variable sites in case X relative to case Q; outer ring (blue) location of the variable site in case U relative to case Q.

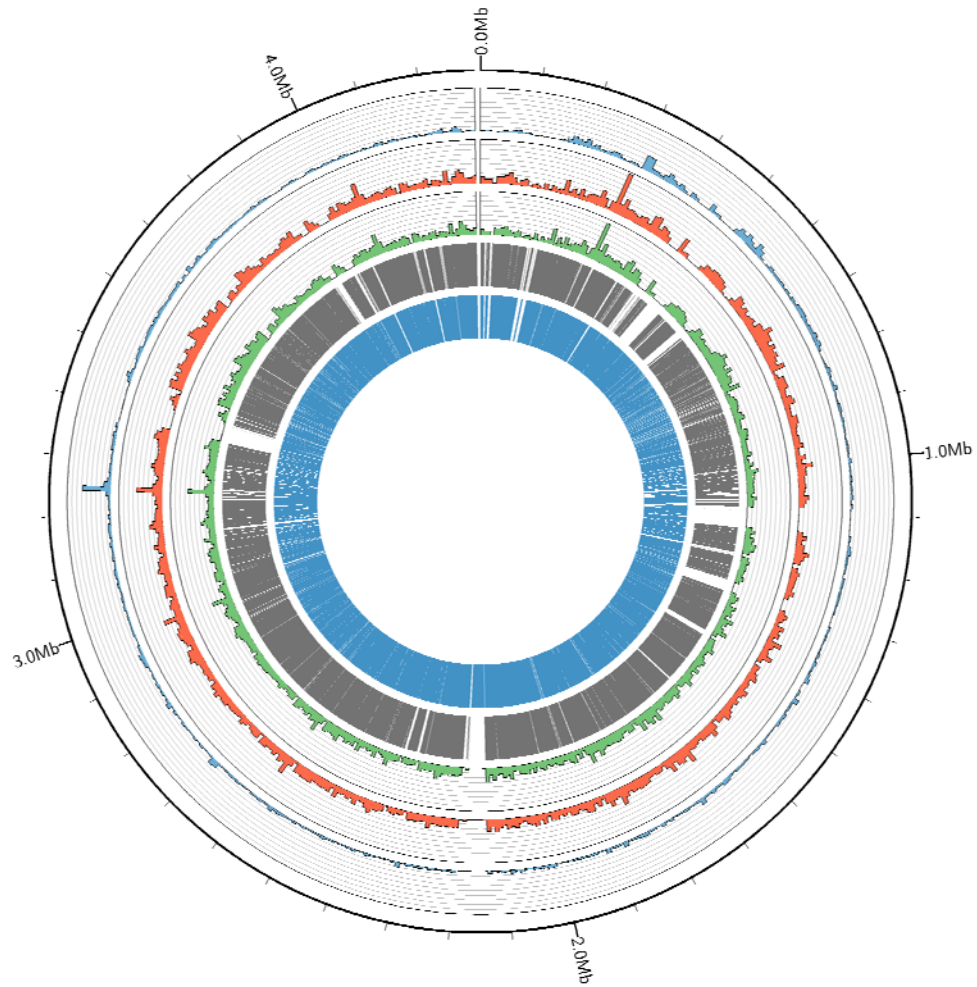

**Supplementary Figure 2. Location of variable sites in *C. difficile* cluster 1.** Circular plot of *C. difficile* genome. From inner ring to outer: inner ring (blue) showing coding regions of the 630 reference genome; (grey) regions of 630 called in case D; (green) frequency histogram of location of observed variable sites in case A relative to case D; (red) frequency histogram of location of variable sites in case B relative to case D; outer ring (blue) frequency histogram of location of variable sites in case C relative to case D.

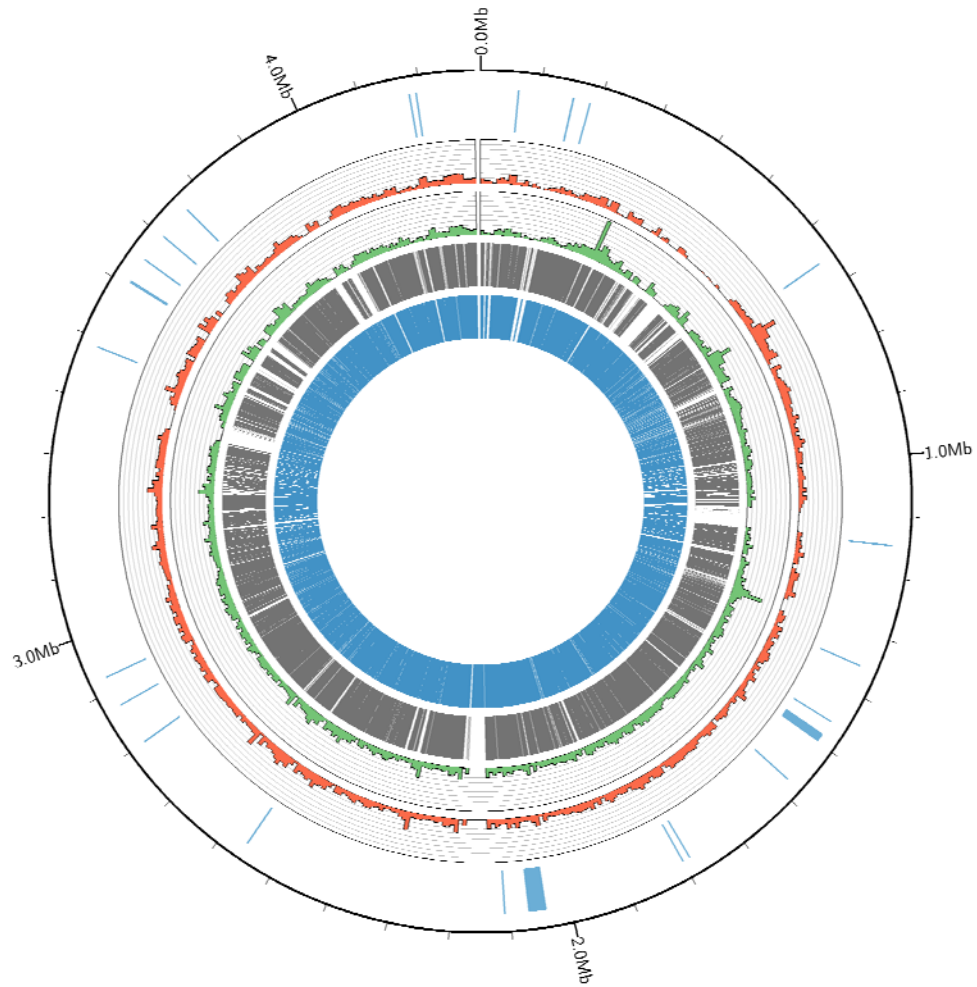

**Supplementary Figure 3. Location of variable sites in *C. difficile* cluster 2.** Circular plot of *C. difficile* genome. From inner ring to outer: inner ring (blue) showing coding regions of the 630 reference genome; (grey) regions of 630 called in case F; (green) frequency histogram of location of observed variable sites in case H relative to case F; (red) frequency histogram of location of variable sites in case E relative to case F; outer ring (blue) location of variable sites in case G relative to case F, each variable site shown as a line.
