# Supplementary material for: A pilot study of rapid benchtop sequencing of Staphylococcus aureus and Clostridium difficile for outbreak detection and surveillance
Source: PubMed Central journal article supplement — BMJ Open. 2012 Jun 6;2(3):e001124. doi: 10.1136/bmjopen-2012-001124 (PMC3378946; doi:10.1136/bmjopen-2012-001124), 2012-06-06
Supplement: bmjopen-2012-001124.draft_revisions.pdf [file bmjopen-2012-001124.draft_revisions.pdf]

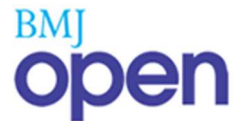

**Prospects of rapid benchtop sequencing for *Staphylococcus aureus* and *Clostridium difficile* outbreak detection and surveillance**

|                               |                                                                                                                                                                                                                                                                                                                                                                                                                                                                                                                                                                                                                                                                                                                                                                                                                                                                                                                                                                                                                                                                                                                                                                                                                                                                                                                                                                                                                                                                                                                                                                                                                                                                                                                                                                                                                                                                                                                                                                                                                                                                                                                                                                                                                                                                                                                                                                                                                                                                                  |
|-------------------------------|----------------------------------------------------------------------------------------------------------------------------------------------------------------------------------------------------------------------------------------------------------------------------------------------------------------------------------------------------------------------------------------------------------------------------------------------------------------------------------------------------------------------------------------------------------------------------------------------------------------------------------------------------------------------------------------------------------------------------------------------------------------------------------------------------------------------------------------------------------------------------------------------------------------------------------------------------------------------------------------------------------------------------------------------------------------------------------------------------------------------------------------------------------------------------------------------------------------------------------------------------------------------------------------------------------------------------------------------------------------------------------------------------------------------------------------------------------------------------------------------------------------------------------------------------------------------------------------------------------------------------------------------------------------------------------------------------------------------------------------------------------------------------------------------------------------------------------------------------------------------------------------------------------------------------------------------------------------------------------------------------------------------------------------------------------------------------------------------------------------------------------------------------------------------------------------------------------------------------------------------------------------------------------------------------------------------------------------------------------------------------------------------------------------------------------------------------------------------------------|
| Journal:                      | <i>BMJ Open</i>                                                                                                                                                                                                                                                                                                                                                                                                                                                                                                                                                                                                                                                                                                                                                                                                                                                                                                                                                                                                                                                                                                                                                                                                                                                                                                                                                                                                                                                                                                                                                                                                                                                                                                                                                                                                                                                                                                                                                                                                                                                                                                                                                                                                                                                                                                                                                                                                                                                                  |
| Manuscript ID:                | bmjopen-2012-001124                                                                                                                                                                                                                                                                                                                                                                                                                                                                                                                                                                                                                                                                                                                                                                                                                                                                                                                                                                                                                                                                                                                                                                                                                                                                                                                                                                                                                                                                                                                                                                                                                                                                                                                                                                                                                                                                                                                                                                                                                                                                                                                                                                                                                                                                                                                                                                                                                                                              |
| Article Type:                 | Research                                                                                                                                                                                                                                                                                                                                                                                                                                                                                                                                                                                                                                                                                                                                                                                                                                                                                                                                                                                                                                                                                                                                                                                                                                                                                                                                                                                                                                                                                                                                                                                                                                                                                                                                                                                                                                                                                                                                                                                                                                                                                                                                                                                                                                                                                                                                                                                                                                                                         |
| Date Submitted by the Author: | 07-Mar-2012                                                                                                                                                                                                                                                                                                                                                                                                                                                                                                                                                                                                                                                                                                                                                                                                                                                                                                                                                                                                                                                                                                                                                                                                                                                                                                                                                                                                                                                                                                                                                                                                                                                                                                                                                                                                                                                                                                                                                                                                                                                                                                                                                                                                                                                                                                                                                                                                                                                                      |
| Complete List of Authors:     | <p>Eyre, David; Nuffield Department of Clinical Medicine, University of Oxford, OX3 9DU; NIHR Oxford Biomedical Research Centre, OX3 9DU,<br/> Golubchik, Tanya; Department of Statistics, University of Oxford, OX1 3TG; NIHR Oxford Biomedical Research Centre, OX3 9DU,<br/> Gordon, N Claire; Nuffield Department of Clinical Medicine, University of Oxford, OX3 9DU; NIHR Oxford Biomedical Research Centre, OX3 9DU,<br/> Bowden, Rory; Department of Statistics, University of Oxford, OX1 3TG; NIHR Oxford Biomedical Research Centre, OX3 9DU; Wellcome Trust Centre for Human Genetics, Oxford, OX3 7BN,<br/> Piazza, Paolo; Wellcome Trust Centre for Human Genetics, Oxford, OX3 7BN,<br/> Batty, Elizabeth; Department of Statistics, University of Oxford, OX1 3TG; NIHR Oxford Biomedical Research Centre, OX3 9DU,<br/> Ip, Camilla; Department of Statistics, University of Oxford, OX1 3TG; NIHR Oxford Biomedical Research Centre, OX3 9DU,<br/> Wilson, Daniel; Department of Statistics, University of Oxford, OX1 3TG; NIHR Oxford Biomedical Research Centre, OX3 9DU,<br/> Didelot, Xavier; Department of Statistics, University of Oxford, OX1 3TG; NIHR Oxford Biomedical Research Centre, OX3 9DU,<br/> O'Connor, Lily; Nuffield Department of Clinical Medicine, University of Oxford, OX3 9DU; Oxford University Hospitals NHS Trust, OX3 9DU,<br/> Lay, Rochelle; Oxford University Hospitals NHS Trust, OX3 9DU,<br/> Buck, David; Wellcome Trust Centre for Human Genetics, Oxford, OX3 7BN,<br/> Kearns, Angela; Health Protection Agency London UK<br/> Shaw, Angela; Ashford and St Peter's NHS Foundation Trust, Department of Microbiology, Surrey, KT16 0PZ,<br/> Paul, John; Health Protection Agency, Royal Sussex County Hospital, BN2 5BE,<br/> Wilcox, Mark; Leeds Teaching Hospitals NHS Trust, Microbiology<br/> Donnelly, Peter; Wellcome Trust Centre for Human Genetics, Oxford, OX3 7BN,<br/> Peto, Tim; Nuffield Department of Clinical Medicine, University of Oxford, OX3 9DU; NIHR Oxford Biomedical Research Centre, OX3 9DU; Oxford University Hospitals NHS Trust, OX3 9DU,<br/> Walker, Ann Sarah; Nuffield Department of Clinical Medicine, University of Oxford, OX3 9DU; NIHR Oxford Biomedical Research Centre, OX3 9DU; Oxford University Hospitals NHS Trust, OX3 9DU; Medical Research Council, Clinical Trials Unit, NW1 2DA,<br/> Crook, Derrick; Nuffield Department of Clinical Medicine, University of</p> |

1  
2  
3  
4  
5  
6  
7  
8  
9  
10  
11  
12  
13  
14  
15  
16  
17  
18  
19  
20  
21  
22  
23  
24  
25  
26  
27  
28  
29  
30  
31  
32  
33  
34  
35  
36  
37  
38  
39  
40  
41  
42  
43  
44  
45  
46  
47  
48  
49  
50  
51  
52  
53  
54  
55  
56  
57  
58  
59  
60

|                                   |                                                                                                                   |
|-----------------------------------|-------------------------------------------------------------------------------------------------------------------|
|                                   | Oxford, OX3 9DU; NIHR Oxford Biomedical Research Centre, OX3 9DU; Oxford University Hospitals NHS Trust, OX3 9DU, |
| <b>Primary Subject Heading:</b>   | Complementary medicine                                                                                            |
| <b>Secondary Subject Heading:</b> | Complementary medicine                                                                                            |
| <b>Keywords:</b>                  | ANAESTHETICS, Anaesthesia in cardiology < ANAESTHETICS, Anaesthesia in ophthalmology < ANAESTHETICS               |
|                                   |                                                                                                                   |

For peer review only

SCHOLARONE™  
Manuscripts

1  
2  
3  
4  
5  
6  
7  
8  
9  
10  
11  
12  
13  
14  
15  
16  
17  
18  
19  
20  
21  
22  
23  
24  
25  
26  
27  
28  
29  
30  
31  
32  
33  
34  
35  
36  
37  
38  
39  
40  
41  
42  
43  
44  
45  
46  
47  
48  
49  
50  
51  
52  
53  
54  
55  
56  
57  
58  
59  
60

## Prospects of rapid benchtop sequencing for *Staphylococcus aureus* and *Clostridium difficile* outbreak detection and surveillance

David W Eyre<sup>1,3</sup>, Tanya Golubchik<sup>2,3</sup>, N Claire Gordon<sup>1,3</sup>, Rory Bowden<sup>2,3,4</sup>, Paolo Piazza<sup>4</sup>, Elizabeth M Batty<sup>2,3</sup>, Camilla LC Ip<sup>2,3</sup>, Daniel J Wilson<sup>2,3</sup>, Xavier Didelot<sup>2,3</sup>, Lily O'Connor<sup>1,5</sup>, Rochelle Lay<sup>5</sup>, David Buck<sup>4</sup>, Angela M Kearns<sup>6</sup>, Angela Shaw<sup>7</sup>, John Paul<sup>8</sup>, Mark H Wilcox<sup>9</sup>, Peter J Donnelly<sup>4</sup>, Tim EA Peto<sup>1,3,5</sup>, A Sarah Walker<sup>1,3,10</sup>, Derrick W Crook<sup>1,3,5</sup>

The following two groups of authors contributed equally to this article, Drs Eyre, Golubchik, Gordon and Bowden; and Drs Peto, Walker and Crook.

1. Nuffield Department of Clinical Medicine, University of Oxford, John Radcliffe Hospital, Oxford, OX3 9DU, United Kingdom
2. Department of Statistics, University of Oxford, 1 South Parks Road, Oxford, OX1 3TG, United Kingdom
3. NIHR Oxford Biomedical Research Centre, John Radcliffe Hospital, Headley Way Oxford, OX3 9DU, United Kingdom
4. Wellcome Trust Centre for Human Genetics, Roosevelt Drive, Oxford, OX3 7BN, United Kingdom
5. Oxford University Hospitals NHS Trust, Headley Way, Oxford, OX3 9DU, United Kingdom
6. Health Protection Agency Centre for Infections, Staphylococcus Reference Unit London, NW9 5EQ, United Kingdom

- 1  
2  
3 7. Ashford and St Peter's NHS Foundation Trust, Department of Microbiology, Surrey,  
4  
5 KT16 0PZ, United Kingdom  
6  
7
- 8 8. Health Protection Agency, Royal Sussex County Hospital, Brighton, BN2 5BE, United  
9  
10 Kingdom  
11
- 12 9. Leeds Teaching Hospitals & University of Leeds, Microbiology, Leeds General  
13  
14 Infirmary  
15  
16 Old Medical School, Leeds, LS1 3EX, United Kingdom  
17  
18
- 19 10. Medical Research Council, Clinical Trials Unit, 222 Euston Road, London, NW1 2DA,  
20  
21 United Kingdom  
22  
23  
24  
25  
26  
27  
28  
29  
30  
31  
32  
33  
34  
35  
36  
37  
38  
39  
40  
41  
42  
43  
44  
45  
46  
47  
48  
49  
50  
51  
52  
53  
54  
55  
56  
57  
58  
59  
60

## Abstract

### Objectives

To investigate the prospects of newly-available benchtop sequencers to provide rapid whole genome data in routine clinical practice. Next generation sequencing has the potential to resolve uncertainties surrounding the route and timing of person-to-person transmission of healthcare-associated infection, which has been a major impediment to optimal management.

### Design

We used Illumina MiSeq benchtop sequencing to undertake case studies investigating potential outbreaks of methicillin-resistant *Staphylococcus aureus* (MRSA) and *Clostridium difficile*.

### Setting

Isolates were obtained from potential outbreaks associated with three UK hospitals.

### Participants

Isolates were sequenced from a cluster of eight MRSA carriers and an associated bacteraemia case in an intensive care unit, another MRSA cluster of six cases, and two clusters of *C. difficile*. Additionally, all *C. difficile* isolates from cases over six-weeks in a single hospital were rapidly sequenced and compared with local strain sequences obtained in the preceding three years.

### Main Outcome Measure

Whole genome genetic relatedness of the isolates within each epidemiological cluster.

## Results

Twenty-six MRSA and 15 *C. difficile* isolates were successfully sequenced and analysed within five days of culture. Both MRSA clusters were confirmed as outbreaks, with most sequences in each cluster indistinguishable and all within three single nucleotide variants (SNVs). Epidemiologically unrelated isolates of the same *spa*-type were genetically distinct ( $\geq 21$  SNVs). In both *C. difficile* clusters closely epidemiologically linked cases (in one case sharing the same strain type) were shown to be genetically distinct ( $\geq 144$  SNVs). A reconstruction applying rapid sequencing in *C. difficile* surveillance provided early outbreak detection and identified previously undetected probable community transmission.

## Conclusions

This benchtop sequencing technology is widely generalizable to human bacterial pathogens. Our findings provide several good examples of how rapid and precise sequencing could transform identification of transmission of healthcare-associated infection, and therefore improve hospital infection control and patient outcomes in routine clinical practice.

## Background

Uncertainty about the exact route and timing of transmission is a major impediment to management of healthcare-associated infection, particularly for endemic pathogens that are also carried commensally, such as *Staphylococcus aureus* and *Clostridium difficile*. This problem impairs the development and implementation of effective, evidence-based measures for infection control.<sup>1</sup>

High-throughput methods using next-generation sequencing (NGS) are revolutionising bacterial genomics, providing sufficient resolution potentially to determine which cases within temporo-spatial clusters are likely to be related.<sup>2-5</sup> With the advent of rapid sequencers, sources of outbreaks have been identified in clinically relevant timescales.<sup>6-8</sup> The latest benchtop machines offer whole-genome sequencing in a format and at a cost accessible to routine hospital laboratories,<sup>9</sup> but the practical prospects for their use are unclear.

Here we demonstrate the potential of benchtop NGS to transform the practice of infection prevention and control in outbreak investigation and surveillance. We present four case studies and a surveillance reconstruction, involving two important healthcare-associated pathogens, *S. aureus* and *C. difficile*. We demonstrate the power of NGS for rapid confirmation of outbreaks of closely related cases, including highlighting potential genetic links between cases not previously known to be related. In other examples we show how NGS can refute transmission between cases that are epidemiologically linked, including between cases sharing the same strain type, indicating the additional benefit benchtop sequencing may provide over existing typing strategies.

## Methods

### *Setting and Patients, Oxford-based case studies*

The Oxford University Hospitals (OUH) NHS Trust comprises 1600 beds across four hospitals, three in Oxford and one 35 miles north in Banbury. It provides >90% of hospital care, and all acute services, to ~600,000 people in Oxfordshire, UK. The OUH microbiology laboratory provides all diagnostic testing for *S. aureus* and *C. difficile* for the region. All cases from three suspected outbreaks between July and October 2011 underwent NGS in parallel with routine infection control investigation (Figure 1). A cluster of carriers of an atypical methicillin-resistant *S. aureus* (MRSA) strain in an intensive care unit (ICU), with an associated bloodstream infection (MRSA cluster 1), and two clusters of *C. difficile* infection (CDI, *C. difficile* clusters 1 and 2) were investigated. All *S. aureus* isolates from patients in this ICU in the following month were sequenced to confirm control of the MRSA outbreak.

### *Setting and Patients, Health Protection Agency Staphylococcus aureus case study*

A possible MRSA outbreak reported to the national Health Protection Agency affecting 6 patients in southern England between July and September 2011 was investigated (Figure 1, MRSA cluster 2). All isolates possessed the *lukS* and *lukF* genes encoding Pantone-Valentine Leukocidin (PVL). Two additional local isolates that shared the same *staphylococcal protein A (spa)*-type, but without an epidemiological connection to the cluster, were also included.

### *Setting and Patients, Oxford-based surveillance reconstruction*



1  
2  
3 To investigate the potential of fast turn-around benchtop sequencing as a surveillance  
4 tool, all CDI cases from one of the OUH hospitals over a six-week period (July-August  
5  
6  
7  
8  
9  
10  
11  
12  
13  
14  
15  
16  
17  
18  
19  
20  
21  
22  
23  
24  
25  
26  
27  
28  
29  
30  
31  
32  
33  
34  
35  
36  
37  
38  
39  
40  
41  
42  
43  
44  
45  
46  
47  
48  
49  
50  
51  
52  
53  
54  
55  
56  
57  
58  
59  
60

To investigate the potential of fast turn-around benchtop sequencing as a surveillance tool, all CDI cases from one of the OUH hospitals over a six-week period (July-August 2010) were sequenced by MiSeq. Although prepared and sequenced together, samples were analysed sequentially to mimic the availability of data in a real situation. Sequence data obtained on the Illumina (San Diego, California, USA) GAIIx and HiSeq platforms from 1185 of 1460 samples taken between September 2007 and June 2010 from a previously described collection of all Oxfordshire CDI cases<sup>10</sup> were available for comparison.

### ***Samples and Sequencing***

*S. aureus* isolates were obtained from clinical samples inoculated onto MRSASelect agar (Bio-Rad, Hemel Hempstead, UK). Antimicrobial sensitivities were determined by disc diffusion and E-testing per European Committee on Antimicrobial Sensitivity Testing guidelines.<sup>11</sup> *C. difficile* isolates were identified following selective culture<sup>12</sup> of toxin enzyme immunoassay-positive diarrhoeal faecal samples.

For both organisms, DNA was extracted using a commercial kit (QuickGene, Fujifilm, Tokyo, Japan), from a single colony sub-cultured onto a Columbia blood agar plate and incubated for 24-48 h. A combination of standard Illumina and adapted protocols was used to produce multiplexed paired-end libraries (DNA fragments with each sample's DNA tagged with a unique index). Pools of 4 samples were sequenced at the Wellcome Trust Centre for Human Genetics, Oxford, UK, using sequencing-by-synthesis technology,<sup>13</sup> on the Illumina MiSeq platform, generating 150 base paired-end reads.

### ***Sequence Assembly and Analysis***

1  
2  
3 Sequence read data were analysed and assembled using a pipeline developed  
4 specifically for bacterial sequencing, as follows: to measure genome-wide sequence  
5 similarity, the full set of properly-paired reads from each isolate was mapped using  
6 Stampy<sup>14</sup> v1.0.11 (without BWA pre-mapping, using an expected substitution rate of  
7 0.01), to either *S. aureus* MRSA252 (Genbank:NC\_002952)<sup>15</sup> or *C. difficile* 630  
8 (Genbank:AM180355), CD630.<sup>16</sup> Single nucleotide variants (SNVs) were identified  
9 across all mapped non-repetitive sites using SAMtools<sup>17</sup> mpileup, after parameter  
10 tuning based on bacterial sequences. Known mobile genetic elements in CD630 were  
11 excluded from the analysis, as they account for 11% of the genome<sup>16</sup> and exchange of a  
12 single element may result in multiple SNVs in one event. A consensus of at least 75%  
13 was required to support a SNV, and calls were required to be homozygous under a  
14 diploid model. Only SNVs supported by at least 5 reads, including one in each direction,  
15 which did not occur at sites with unusual depth and were not within 12bp of other  
16 variants were accepted. To identify variation in gene content, sequence reads were  
17 assembled *de novo* using Velvet v1.0.18,<sup>18</sup> with parameter values optimised to maximise  
18 n50 (50% of the assembly in contigs equal to or larger than this value). These  
19 assemblies were used to identify antibiotic resistance genes for *S. aureus* and to  
20 determine *in silico* multi-locus sequence types (MLST)<sup>12</sup> for *C. difficile*. Maximum  
21 likelihood trees were estimated using PhyML<sup>19</sup> using a Jukes-Cantor model.  
22  
23  
24  
25  
26  
27  
28  
29  
30  
31  
32  
33  
34  
35  
36  
37  
38  
39  
40  
41  
42  
43  
44  
45  
46  
47  
48  
49  
50

51 To assess both MiSeq data quality and its comparability with existing HiSeq data, the  
52 MRSA252 and CD630 references and one other isolate of each organism were  
53 sequenced on both platforms. Duplicates of two of the *S. aureus* isolates from MRSA  
54 cluster 1 and a MRSA252 sample were run on MiSeq as controls.  
55  
56  
57  
58  
59  
60

### **Ethics Statement**

Ethical approval for sequencing *S. aureus* and *C. difficile* isolates from routine clinical samples and linkage to patient data without individual patient consent was obtained from Berkshire Ethics Committee (10/H0505/83) and the UK National Information Governance Board (8-05(e)/2010). The Health Protection Agency has Patient Information Advisory Group approval to hold and analyse surveillance data for public health purposes under Section 60 of the Health and Social Care Act 2001.

### **Findings**

Twenty-six *S. aureus* isolates (from 24 patients) and 15 *C. difficile* isolates (15 patients) (Figure 1) were sequenced using the MiSeq benchtop sequencer, obtaining mean read-depths of 77.6 and 50.4, respectively, and reference genome coverages of 82.7% and 79.5%, respectively. The entire process from commencing DNA extraction to measuring genomic relatedness for each set of sequences was completed within five working days of culture. No sequence differences were detected in the two pairs of replicates, between CD630 and MRSA252 and published reference sequences, or between four samples sequenced both with MiSeq and earlier with HiSeq.

### ***NGS confirms a ward outbreak, despite discordant antimicrobial and strain typing data (MRSA cluster 1: Figure 2A)***

Ten MRSA isolates obtained from eight patients from the same ICU over four months belonged to the same *spa*-type (t5973) and were indistinguishable by pulsed-field gel electrophoresis (PFGE). Ward stays and the first positive isolate per patient are shown in Figure 2A. The extreme rarity of this *spa*-type in the UK (no t5973 isolates held by the

1  
2  
3 National Reference Laboratory), and the fact they exhibited indistinguishable PFGE  
4 types, would normally be considered sufficient evidence for an outbreak. However, the  
5 isolates showed methicillin heteroresistance and differed in penicillin and tetracycline  
6 sensitivity (Table 1); no common source was identified, casting doubt on the connection  
7 between the first seven cases and with the bloodstream infection, which occurred after  
8 a further 8 weeks, but in the absence of any contemporaneous patient MRSA isolates.  
9  
10  
11  
12  
13  
14  
15  
16  
17  
18  
19

20 No sequence differences were detected in the mapped genomes between isolates from 6  
21 of the carriage cases (A,B,C,D,F,G); case E differed at a single site. The 2 isolates (nasal  
22 swab and blood culture) from the bloodstream infection case (H), were  
23 indistinguishable and differed by three SNVs from the other cases. Given previous  
24 estimated rates of short-term *S. aureus* evolution of ~7.6-7.9 SNVs/genome/year,<sup>4 20</sup>  
25 these data are consistent with recent acquisition from a common source. All were *mecA*  
26 positive by PCR and sequencing; however, two plasmids not present in MRSA252,  
27 encoding the *blaZ* and *tetK* genes, were detected in seven and five of the isolates,  
28 respectively. These genotypic findings matched the phenotypic susceptibility results  
29 (Table 1).  
30  
31  
32  
33  
34  
35  
36  
37  
38  
39  
40  
41  
42  
43  
44  
45  
46

#### 47 ***NGS confirms transmission of isolates during short periods of shared ward*** 48 49 ***exposure (MRSA cluster 2; Figure 2B)***

50  
51 Six PVL-positive MRSA isolates were identified over three months. Five had been  
52 inpatients on the same ward (Q,R,S,T,V) (with overlapping stays of 1-2 days in 4 cases)  
53 and one (U) was a relative of V. All were *spa*-type t657, which, although relatively rare,  
54 has occurred sporadically in this region. The isolates were also indistinguishable by  
55 PFGE. Given the timescale, it was unclear whether these cases reflected a genuine  
56  
57  
58  
59  
60

1  
2  
3 outbreak or background circulation of related organisms. In fact, only one SNV was  
4 detected among all six samples, indicating a recent common source. In contrast, two  
5 isolates originating from the same geographical area and with the same *spa* and  
6 susceptibility profiles, but with slightly different PFGE types and no known  
7 epidemiological link, differed from the main cluster at 21 and 37 sites, respectively. The  
8 sites were distributed throughout the genome ruling out a single recombination event  
9 accounting for all the differences. Additionally, no variant sites were detected within the  
10 *mutS*, *mutS2*, *mutL* genes associated with hypermutation.<sup>21</sup> The SNV differences are  
11 therefore consistent with a shared ancestry two to five years earlier.  
12  
13  
14  
15  
16  
17  
18  
19  
20  
21  
22  
23  
24  
25  
26  
27

28 ***NGS refutes transmission between suspected linked cases (C. difficile cluster 1;***

29 **Figure 3A)**

30  
31  
32 The OUH infection control service identified three CDI cases (B,C,D) occurring over four  
33 days among inpatients on the same ward. While UK Department of Health guidance<sup>22</sup>  
34 states that a cluster should only be considered an “outbreak” when the cases share a  
35 strain type (e.g. by MLST or PCR-ribotyping), such information is slow to obtain. In  
36 practice, therefore, such clusters are treated as presumptive outbreaks requiring  
37 intensive management. Sequencing showed that all three cases had different  
38 computationally predicted sequence types (STs) and differed at >4000 sites distributed  
39 throughout the genome. With short-term *C. difficile* evolution rates estimated from  
40 serial sampling of patients with recurrent disease at ~2.3 SNVs/genome/year (Xavier  
41 Didelot, personal communication 20 January 2012, manuscript under review), recent  
42 transmission between these cases can be excluded with confidence. However, a fourth  
43 case (A) that occurred 12 days previously, and was not initially included in the infection  
44  
45  
46  
47  
48  
49  
50  
51  
52  
53  
54  
55  
56  
57  
58  
59  
60

1  
2  
3 control investigation, was indistinguishable from case B; case A was found to have been  
4  
5 in an adjacent side room to case B, strongly suggesting ward-based transmission.  
6  
7  
8  
9

10 ***NGS demonstrates that isolates of the same strain type are not necessarily linked by***  
11 ***transmission (C. difficile cluster 2; Figure 3B)***  
12

13  
14  
15 Three CDI cases (F,G,H) occurring over a three-week period in an elective surgical unit  
16  
17 were suggestive of transmission, since the most recent previous CDI (E) had occurred  
18  
19 six months before. However, isolates from the three cases were sufficiently genomically  
20  
21 diverse to rule out transmission. Notably, two isolates shared a sequence type (ST5)  
22  
23 under the strain-typing scheme used in OUH, but differed at 144 sites distributed  
24  
25 throughout the genome, providing an example of the extra discriminatory power of  
26  
27 sequencing over existing typing schemes in ruling out transmission.  
28  
29  
30  
31  
32  
33

34 ***NGS can transform surveillance (C. difficile reconstruction)***  
35

36  
37 All seven CDI cases occurring in one OUH hospital over six weeks were sequenced on  
38  
39 the MiSeq platform and compared with each other and with a 'historical' sequence  
40  
41 database comprising 1185 isolates from regional CDI cases occurring in the previous  
42  
43 three years.  
44  
45  
46  
47  
48

49 Four of the seven cases formed a genetic cluster containing variation at only two SNVs,  
50  
51 indicating probable transmission; these cases shared time and space on the same ward  
52  
53 around their CDI. If this set of cases could have been sequenced in real time, an  
54  
55 outbreak would have become apparent after the second case, and it is possible that  
56  
57 subsequent transmissions might have been prevented. The genetically most similar  
58  
59 historical CDI case differed from the four genetically clustered cases at three SNVs  
60

1  
2  
3 (Figure 4); however, it occurred three years earlier and 30 miles away. Therefore, no  
4  
5 direct relationship could be discerned between historical cases and the current  
6  
7 outbreak.  
8  
9

10  
11  
12 The three remaining cases in the group of seven reconstruction cases differed from the  
13  
14 other four cases and from each other at >3000 SNVs. One individual, diagnosed on the  
15  
16 day of admission and last admitted eight months previously, yielded a *C. difficile*  
17  
18 sequence indistinguishable from 11 previous CDI cases, including local strains from 6  
19  
20 months previously. Since this patient had not shared inpatient time with any of the  
21  
22 other cases, and most of the genetically related cases had occurred outside of OUH  
23  
24 hospitals, this may represent previously unsuspected community-based transmission,  
25  
26 which could have been investigated had sequence information been available in 2010.  
27  
28 No plausible hospital or community patient source could be identified for the other two  
29  
30 cases; however, previous cases differing from them at four to ten SNVs were identified  
31  
32 in the previous six months to three years, consistent with a local strain origin.  
33  
34  
35  
36  
37  
38  
39  
40  
41  
42  
43

## 44 Discussion

45  
46 This study provides strong evidence in two major healthcare-associated pathogens, *S.*  
47  
48 *aureus* and *C. difficile*, that benchtop sequencing can transform hospital infection control  
49  
50 through high precision confirmation and rejection of transmission using genetic data.  
51  
52 We also show this technology offers turnaround times of under a week in a format that,  
53  
54 in contrast to molecular typing, is organism-independent. The results obtained in this  
55  
56 study were obtained quickly enough to influence cluster investigations, and in two of  
57  
58 the outbreaks described were used to inform the hospital's response.  
59  
60

1  
2  
3  
4  
5  
6 Whole-genome sequencing provides the ultimate resolution of genetic relationships.  
7  
8 This offers two clear benefits for inference of transmission events. Firstly, putative  
9  
10 transmission events between genetically very distinct isolates can be refuted with  
11  
12 confidence. This is of particular value by comparison with widely used current typing  
13  
14 strategies that are unable to distinguish isolates belonging to a prevalent strain type; for  
15  
16 example PCR-ribotype-027 (NAP-1) accounts for ~35% of *C. difficile* strains in UK and  
17  
18 N. American hospitals.<sup>23 24</sup> Secondly, close genetic relationships combined with clinical  
19  
20 and epidemiological evidence can provide strong evidence in favour of a putative  
21  
22 transmission event, justifying infection control intervention. Notably, a genetic match in  
23  
24 the absence of an obvious epidemiological link may legitimately prompt investigation of  
25  
26 new routes of transmission, such as the possible community transmission identified in  
27  
28 our *C. difficile* surveillance reconstruction. However, close genetic links cannot be used  
29  
30 in isolation to confirm transmission. For example, we identified genetically similar cases  
31  
32 separated by both time and space, emphasising the importance of analysing genetic  
33  
34 data alongside epidemiological information. The main limitation of this study is it is not  
35  
36 large enough to provide a formal comparison with existing technology including a  
37  
38 health economic evaluation.  
39  
40  
41  
42  
43  
44  
45  
46  
47  
48

49 NGS technology is widely generalizable to human bacterial pathogens,<sup>25</sup> and has been  
50  
51 used previously to investigate transmission of infectious disease.<sup>2-5</sup> Although the  
52  
53 benefits of rapid sequencers have been shown in high profile national outbreaks<sup>6-8</sup> we  
54  
55 provide the first demonstration of rapid sequencing in a benchtop format and applied to  
56  
57 routine hospital infection control.  
58  
59  
60



Existing typing schemes, such as *spa*, PFGE, PCR-ribotyping, and MLST, have established a framework in the application of genetic data in outbreak investigation. However, the organism-specific application of these strain-typing methods, often requiring isolates to be sent to a specific reference laboratory, in practice means that many infection clusters remain untyped. Benchtop sequencing builds upon existing typing expertise, offering rapidly available and increased resolution data from an organism-independent platform. This means that a single technology will provide the capacity for individual hospital laboratories to support outbreak investigation for a range of pathogens, and allow infection control personnel to efficiently target resources to genuine outbreaks. With the cost of sequencing falling rapidly,<sup>26 27</sup> and the prospect within 12 months of obtaining complete accurate pathogen sequences in hours, and for as little as US\$10 per sequence,<sup>28</sup> it is likely that benchtop sequencing will soon be comparable in price to existing molecular typing, while offering considerable additional benefits. As well as identifying transmissions, the reproducible and digital nature of locally generated sequence data make these ideal for sharing in national and potentially international surveillance, for sequence-based resistance prediction, and for precise, generic species identification.<sup>25</sup>

The case studies in this paper provide a clear rationale for future work undertaking formal comparisons of benchtop NGS with existing local and national typing schemes. Such comparisons will need to include formal health-economic assessments that account for the capital expense of establishing desktop NGS in a laboratory, as well as the potential cost-savings associated with more focused cluster investigation and infection control interventions. The improved accuracy in identifying within hospital transmission should also lead to better metrics of hospital infection control

1  
2  
3 performance – and provide an opportunity for further reductions in the incidence of  
4  
5 healthcare-associated infections and hence improvements in patient outcomes.  
6  
7  
8  
9  
10  
11  
12  
13  
14  
15  
16  
17  
18  
19  
20  
21  
22  
23  
24  
25  
26  
27  
28  
29  
30  
31  
32  
33  
34  
35  
36  
37  
38  
39  
40  
41  
42  
43  
44  
45  
46  
47  
48  
49  
50  
51  
52  
53  
54  
55  
56  
57  
58  
59  
60

For peer review only

## Acknowledgements

We thank Margot Nicholls and Angela Iversen from Surrey and Sussex Health Protection Unit for providing epidemiological details. We thank David Griffiths and Alison Vaughan for assistance with sample preparation, and the Oxford MRC High Throughput Sequencing Hub team.

## Funding

This study was supported by the NIHR Oxford Biomedical Research Centre and the UKCRC Modernising Medical Microbiology Consortium, the latter funded under the UKCRC Translational Infection Research Initiative supported by Medical Research Council, Biotechnology and Biological Sciences Research Council and the National Institute for Health Research on behalf of the Department of Health (Grant G0800778) and the Wellcome Trust (Grant 087646/Z/08/Z). We acknowledge the support of Wellcome Trust core funding (Grant 090532/Z/09/Z). TEAP and DWC are NIHR Senior Investigators. DWE is a NIHR Doctoral Research Fellow.

## Author contributions

All authors were involved in critical review of the manuscript and have seen and approved the final version. Specific contributions as follows: study conception and design: DWC, TEAP, ASW, PJD, RB, MHW, JP; sample acquisition: LO, RL, NCG, AMK, AS, JP; sample sequencing: PP, DB; sequence data processing pipeline: RB, TG, EMB, CLCI; analysis of epidemiological and sequence data: DWE, TG, NCG, DJW, XD, TEAP, ASW, DWC; drafting the manuscript: DWE, NCG, TG, ASW, TP, DWC. The following two groups of authors contributed equally to this article, DWE, TG, NCG and RB; and TEAP, ASW and

1  
2  
3 DWC. All authors had full access to all the study data and take responsibility for the  
4 integrity of the data and the accuracy of the data analysis. DWC is the guarantor.  
5  
6  
7  
8  
9

### 10 **Conflicts of Interest**

11 All authors have completed the Unified Competing Interest form  
12  
13 at [www.icmje.org/coi\\_disclosure.pdf](http://www.icmje.org/coi_disclosure.pdf) (available on request from the corresponding  
14 author). The institution of DWC and TEAP received per-case funding from Optimer  
15 Pharmaceuticals to support fidaxomicin trial patient expenses. DWC and TEAP also  
16 received honoraria from Optimer Pharmaceuticals for participation in additional  
17 meetings related to investigative planning for fidaxomicin. MHW has received honoraria  
18 for consultancy work, financial support to attend meetings and research funding from  
19 bioMerieux, Optimer, Novacta, Pfizer, Summit, The Medicines Company, Viropharma,  
20 and Astellas. No other author has a conflict of interest.  
21  
22  
23  
24  
25  
26  
27  
28  
29  
30  
31  
32  
33  
34  
35  
36

### 37 **Data sharing**

38 Read data generated for this study are available via the Short Read Archive  
39 (<http://www.ncbi.nlm.nih.gov/sra>). <<<Details to be provided if accepted for  
40 publication.>>>  
41  
42  
43  
44  
45  
46  
47  
48

### 49 **Exclusive Licence**

50 The Corresponding Author has the right to grant on behalf of all authors and does grant  
51 on behalf of all authors, an exclusive licence (or non exclusive for government  
52 employees) on a worldwide basis to the BMJ Publishing Group Ltd to permit this article  
53 (if accepted) to be published in BMJ editions and any other BMJ PGL products and  
54 sublicences such use and exploit all subsidiary rights, as set out in our licence.  
55  
56  
57  
58  
59  
60

## What this paper adds

### *What is already known on this subject*

- Current infection control investigation of potential healthcare-associated infection outbreaks is based around epidemiological information and molecular typing, typically carried out by reference laboratories
- Next generation sequencing has the potential to resolve uncertainties surrounding the route and timing of person-to-person transmission, which has been a major impediment to optimal management

### *What this study adds*

- Benchtop sequencing provides a organism-independent tool that can rapidly generate sequence data for pathogen tracking, in a format deployable in routine hospital laboratories

**MRSA Cluster 1**

10 isolates (8 patients), obtained in an intensive care unit, July – September 2011

- 8 nasal screening swabs, from 7 patients, positive over 2 weeks [*S. aureus* cases A-G]
- 1 blood culture and 1 nasal swab from bacteraemic patient 8 weeks later [*S. aureus* case H]

All 8 methicillin-sensitive *S. aureus* isolates from the same unit in October 2011 also sequenced to confirm outbreak control (and assess background diversity)

- 8 nasal screening swabs [*S. aureus* cases I-P]

**MRSA Cluster 2**

6 Health Protection Agency isolates associated with a single hospital, July – September 2011

- 3 caesarian section wound infection wound swabs [*S. aureus* cases Q, R, S]
- 1 breast abscess – aspirate [*S. aureus* case T]
- 1 finger abscess – aspirate [*S. aureus* case U]
- 1 nasal swab (case family member) [*S. aureus* case V]

2 unrelated cases sharing the same *spa* type included for comparison

- [*S. aureus* cases W, X]

***C difficile* Cluster 1**

4 CDI cases within 17 days, same ward (medical specialty), September – October 2011

- 4 stool samples [*C. difficile* cases A-D]

***C difficile* Cluster 2**

3 CDI cases within 22 days, same unit (elective surgical specialty), September – October 2011, preceding CDI case also sequenced

- 4 stool samples [*C. difficile* cases E-H]

***C difficile* Surveillance**

All 7 CDI cases in a single hospital over 6 weeks, July – August 2010 sequenced and compared with previously sequenced isolates from September 2007 – June 2010

- 7 stool samples

**Figure 1. Clusters and samples.** All clusters of cases occurred in the Oxford University Hospitals between July and October 2011, apart from MRSA cluster 2 where samples were obtained by the Health Protection Agency from an outbreak in southern England between July and September 2011. CDI, *C difficile* infection:  $\geq 3$  unformed stools in 24 hours, enzyme immunoassay-positive, culture-positive.

| Patient | Sample date | Antibiotic susceptibility |       |              |       | Gene presence/absence |      |
|---------|-------------|---------------------------|-------|--------------|-------|-----------------------|------|
|         |             | Penicillin                |       | Tetracycline |       | blaZ                  | tetK |
|         |             | DD                        | MIC   | DD           | MIC   |                       |      |
| A       | 25/7        | R                         | 2     | S            | 0.094 | +                     | -    |
| B       | 27/7        | R                         | 2     | R            | 24    | +                     | +    |
| C       | 27/7        | R                         | 4     | S            | 0.094 | +                     | -    |
| D (i)   | 5/8         | R                         | 3     | R            | 24    | +                     | +    |
| D (ii)  | 10/8        | R                         | 2     | R            | 24    | +                     | +    |
| E       | 8/8         | R                         | 4     | R            | 32    | +                     | +    |
| F       | 8/8         | S                         | 0.047 | S            | 0.064 | -                     | -    |
| G       | 8/8         | R                         | 3     | S            | 0.094 | +                     | -    |
| H(i)    | 28/9        | R                         | 4     | R            | 24    | +                     | +    |
| H (ii)* | 29/9        | R                         | 2     | R            | 24    | +                     | +    |

**Table 1. MRSA Cluster 1, comparison of antibiotic susceptibility and associated genetic elements.** DD: disc diffusion (R: resistant; S: susceptible), MIC: minimum inhibitory concentration (mg/litre). Screening swabs were obtained from patient D on two separate dates. All isolates were methicillin heteroresistant, appearing susceptible on routine testing despite detection of *mecA* by PCR and sequencing. This explains why isolate F appeared phenotypically penicillin susceptible on disc diffusion and E-testing. The mechanism of heteroresistance for these isolates has not yet been fully elucidated although the penicillin-susceptible-methicillin-resistant phenotype has been described.<sup>29</sup> \*The second isolate from patient H is from a positive blood culture.

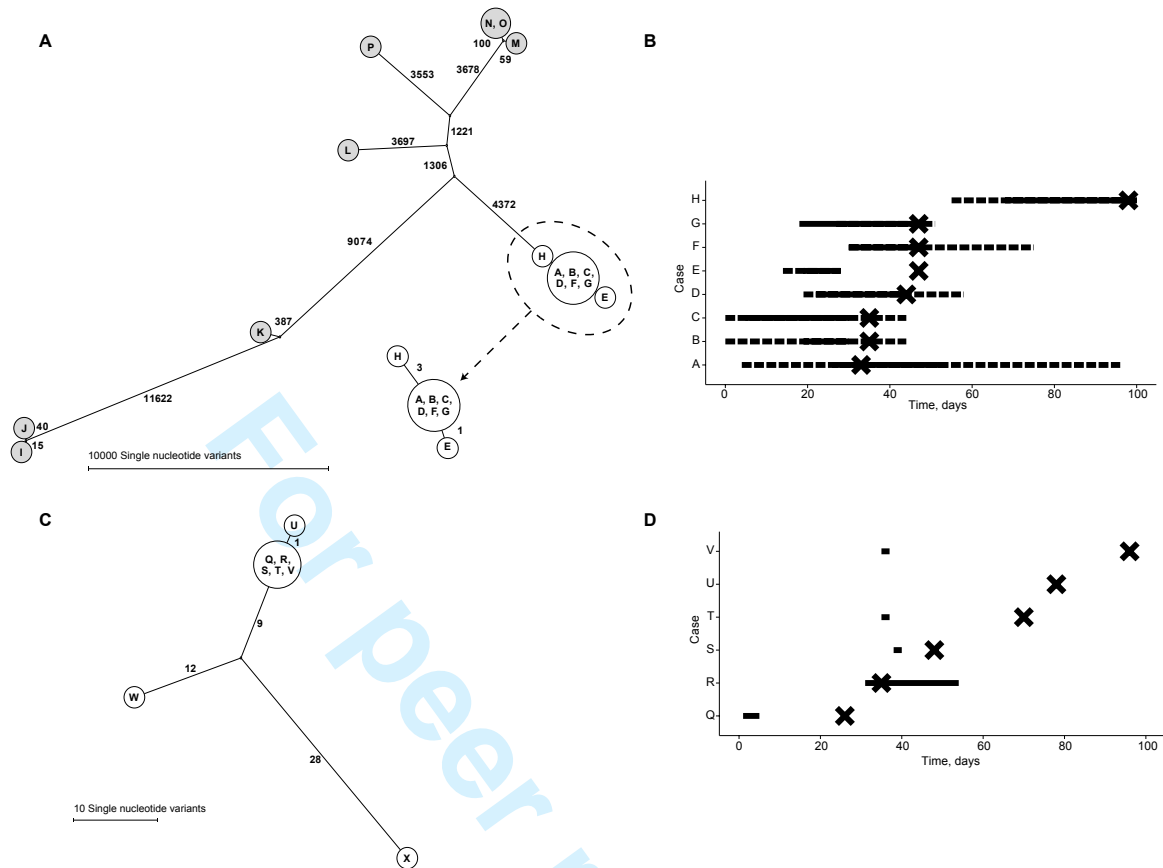

**Figure 2. *S. aureus* cluster genetic and epidemiological relationships. Panel A-B,**

**MRSA cluster 1 and related MSSA isolates. Panel C-D, MRSA cluster 2. Panel A**

shows all isolates from MRSA cluster 1 (white circles) and all *S. aureus* isolates from the following month (grey circles, all methicillin sensitive). The left panels show the genetic relationships between cases as maximum likelihood trees, labelled with the number of SNVs at which samples differ. Genetically indistinguishable samples are shown in the same circle. The right panels show time spent on the same ward as a horizontal line for each case in both clusters. In panel B the dashed line indicates time on the same ward, and the solid line time in the same bay. In panel D the solid line indicates time spent on the same ward. The timing of the first positive sample for each case is indicated with a cross. Case H subsequently developed a bloodstream infection.



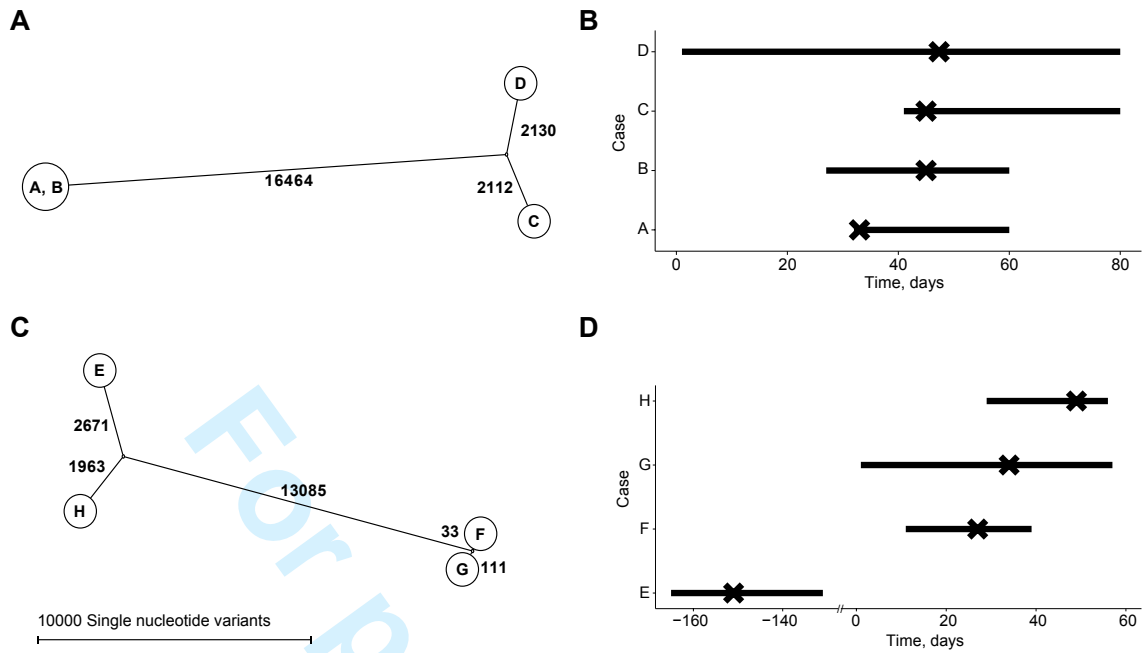

**Figure 3. *C. difficile* cluster genetic and epidemiological relationships. Panel A-B, *C. difficile* cluster 1. Panel C-D, *C. difficile* cluster 2. The left panels show the genetic relationships between cases as maximum likelihood trees, labelled with the number of SNVs at which samples differ. Genetically indistinguishable cases are shown in the same circle. The right hand panels (B, D) show time spent on the same ward as a horizontal line for each case. The timing of the first positive sample for each case is indicated with a cross.**

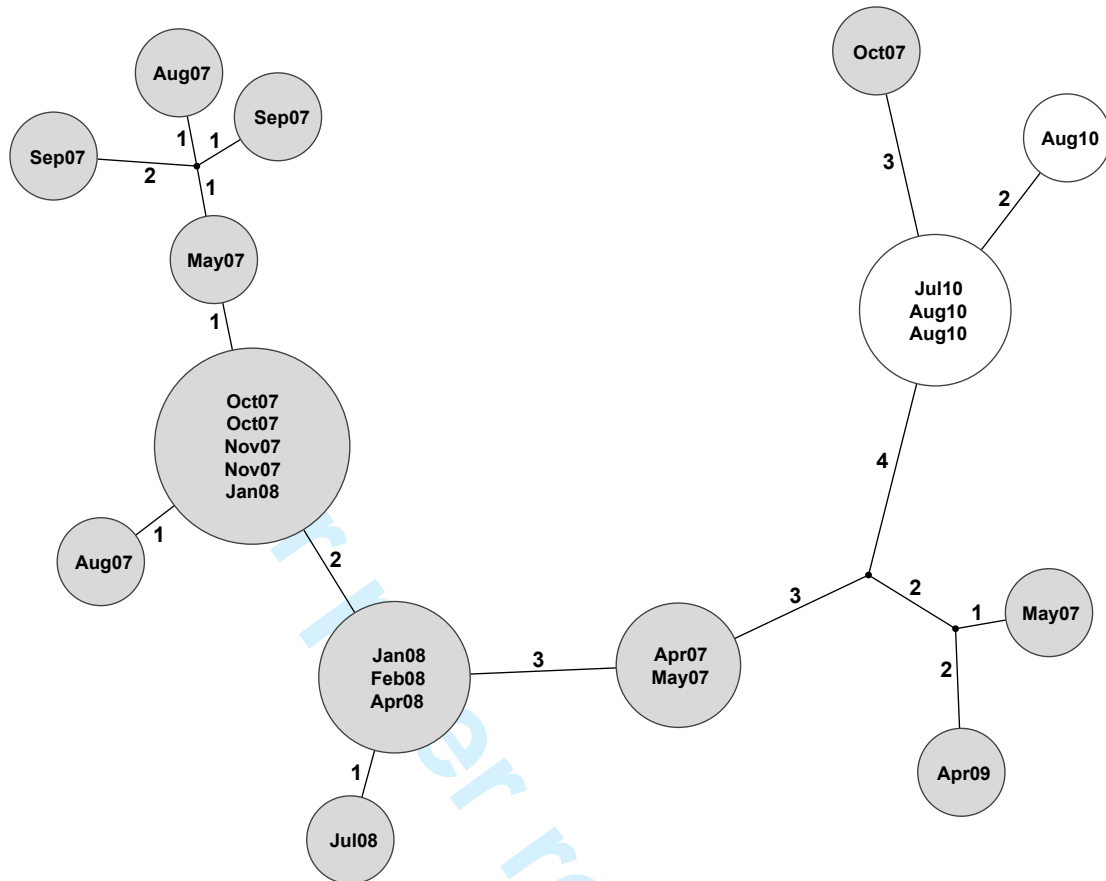

**Figure 4. Potential for whole-genome sequencing to transform *C. difficile***

**surveillance.** Genetic relationships between cases are shown as a maximum likelihood tree, labelled with the number of SNVs at which samples differ. Genetically indistinguishable cases are shown in the same circle. Cases from an existing database of sequenced isolates are shown in grey circles with the date of isolation. Four cases arising during a six-week surveillance reconstruction are shown in white circles. Three additional cases sequenced as part of the reconstruction differed at >3000 SNVs from the cases shown and are not shown in the figure. The maximum likelihood tree shown is consistent with data, however homoplasmy was observed in one of the variant sites, 2464157 in the CD630 reference genome.

## References

1. Forder A. A brief history of infection control - past and present. *S Afr Med J*. 2007;97(11):1161-1164.
2. Gardy JL, Johnston JC, Ho Sui SJ, et al. Whole-genome sequencing and social-network analysis of a tuberculosis outbreak. *New Engl J Med*. 2011;364(8):730-739.
3. Lieberman TD, Michel J-B, Aingaran M, et al. Parallel bacterial evolution within multiple patients identifies candidate pathogenicity genes. *Nat Genet*. 2011;43(12):1275-1280.
4. Harris SR, Feil EJ, Holden MTG, et al. Evolution of MRSA During Hospital Transmission and Intercontinental Spread. *Science*. 2010;327(5964):469-474.
5. Reeves PR, Liu B, Zhou Z, et al. Rates of mutation and host transmission for an *Escherichia coli* clone over 3 years. *PLoS ONE*. 2011;6(10):e26907.
6. Chin C-S, Sorenson J, Harris JB, et al. The origin of the Haitian cholera outbreak strain. *New Engl J Med*. 2011;364(1):33-42.
7. Rasko DA, Webster DR, Sahl JW, et al. Origins of the *E. coli* strain causing an outbreak of hemolytic-uremic syndrome in Germany. *New Engl J Med*. 2011;365(8):709-717.
8. Rohde H, Qin J, Cui Y, et al. Open-source genomic analysis of Shiga-toxin-producing *E. coli* O104:H4. *New Engl J Med*. 2011;365(8):718-724.
9. Mellmann A, Harmsen D, Cummings CA, et al. Prospective genomic characterization of the German enterohemorrhagic *Escherichia coli* O104:H4 outbreak by rapid next generation sequencing technology. *PLoS ONE*. 2011;6(7):e22751.

- 1  
2  
3 **10.** Walker AS, Eyre DW, Wyllie DH, et al. Characterisation of *Clostridium difficile*  
4 Hospital Ward-based Transmission Using Extensive Epidemiological Data and  
5 Molecular Typing. *PLoS Med.* 2012;9(2):e1001172:1001171-1001112.  
6  
7
- 8  
9 **11.** European Committee on Antimicrobial Susceptibility Testing  
10 Breakpoint tables for interpretation of MICs and zone diameters, version 2.0  
11 [http://www.eucast.org/fileadmin/src/media/PDFs/EUCAST\\_files/Disk\\_test\\_doc](http://www.eucast.org/fileadmin/src/media/PDFs/EUCAST_files/Disk_test_documents/EUCAST_breakpoints_v_2.0_120101.pdf)  
12 [uments/EUCAST\\_breakpoints\\_v\\_2.0\\_120101.pdf](http://www.eucast.org/fileadmin/src/media/PDFs/EUCAST_files/Disk_test_documents/EUCAST_breakpoints_v_2.0_120101.pdf). Accessed January 20, 2012.  
13  
14
- 15  
16 **12.** Griffiths D, Fawley W, Kachrimanidou M, et al. Multilocus sequence typing of  
17 *Clostridium difficile*. *J Clin Microbiol.* 2010;48(3):770-778.  
18  
19
- 20  
21 **13.** Bentley DR, Balasubramanian S, Swerdlow HP, et al. Accurate whole human  
22 genome sequencing using reversible terminator chemistry. *Nature.*  
23 2008;456(7218):53-59.  
24
- 25  
26 **14.** Lunter G, Goodson M. Stampy: A statistical algorithm for sensitive and fast  
27 mapping of Illumina sequence reads. *Genome Res.* 2011;21(6):936-939.  
28
- 29  
30 **15.** Holden MTG, Feil EJ, Lindsay JA, et al. Complete genomes of two clinical  
31 *Staphylococcus aureus* strains: evidence for the rapid evolution of virulence and  
32 drug resistance. *Proc Natl Acad Sci U S A* 2004;101(26):9786-9791.  
33  
34
- 35  
36 **16.** Sebahia M, Wren BW, Mullany P, et al. The multidrug-resistant human pathogen  
37 *Clostridium difficile* has a highly mobile, mosaic genome. *Nature Gen.*  
38 2006;38(7):779-786.  
39  
40
- 41  
42 **17.** Li H, Handsaker B, Wysoker A, et al. The Sequence Alignment/Map format and  
43 SAMtools. *Bioinformatics.* 2009;25(16):2078-2079.  
44  
45
- 46  
47 **18.** Zerbino DR, Birney E. Velvet: Algorithms for de novo short read assembly using  
48 de Bruijn graphs. *Genome Res.* 2008;18(5):821-829.  
49  
50  
51  
52  
53  
54  
55  
56  
57  
58  
59  
60

- 1  
2  
3  
4  
5  
6  
7  
8  
9  
10  
11  
12  
13  
14  
15  
16  
17  
18  
19  
20  
21  
22  
23  
24  
25  
26  
27  
28  
29  
30  
31  
32  
33  
34  
35  
36  
37  
38  
39  
40  
41  
42  
43  
44  
45  
46  
47  
48  
49  
50  
51  
52  
53  
54  
55  
56  
57  
58  
59  
60
19. Guindon S, Gascuel O. A simple, fast, and accurate algorithm to estimate large phylogenies by maximum likelihood. *Syst Biol*. 2003;52(5):696-704.
20. Young BC, Golubchik T, Batty EM, et al. Evolutionary dynamics of *Staphylococcus aureus* during progression from carriage to disease. *Proc Natl Acad Sci U S A*. 2012 [in press].
21. Prunier AL, Leclercq R. Role of mutS and mutL Genes in Hypermutability and Recombination in *Staphylococcus aureus*. *J Bacteriol*. 2005;187(10):3455-3464.
22. Department of Health. Clostridium difficile infection: How to deal with the problem. 2009: 1-140.
23. Dingle KE, Griffiths D, Didelot X, et al. Clinical Clostridium difficile: clonality and pathogenicity locus diversity. *PLoS ONE*. 2011;6(5):e19993.
24. Louie TJ, Miller MA, Mullane KM, et al. Fidaxomicin versus vancomycin for Clostridium difficile infection. *New Engl J Med*. 2011;364(5):422-431.
25. Relman DA. Microbial genomics and infectious diseases. *N Engl J Med* 2011; **365**: 347-357.
26. The Sequence Explosion. *Nature*. Apr 30 2010;464:671-672.
27. Metzker ML. Sequencing technologies — the next generation. *Nat Rev Genet*. 2009;11(1):31-46.
28. Nature News. Nanopore genome sequencer makes its debut.  
<http://www.nature.com/news/nanopore-genome-sequencer-makes-its-debut-1.10051> doi:10.1038/nature.2012.10051. Accessed February 22, 2012.
29. Blanc DS, Petignat C, Moreillon P, et al. Unusual spread of a penicillin-susceptible methicillin-resistant *Staphylococcus aureus* clone in a geographic area of low incidence. *Clin Infect Dis*. 1999;29(6):1512-1518.

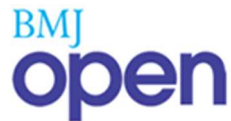

**A pilot study of rapid benchtop sequencing of  
Staphylococcus aureus and Clostridium difficile for outbreak  
detection and surveillance**

|                               |                                                                                                                                                                                                                                                                                                                                                                                                                                                                                                                                                                                                                                                                                                                                                                                                                                                                                                                                                                                                                                                                                                                                                                                                                                                                                                                                                                                                                                                                                                                                                                                                                                                                                                                                                                                                                                                                                                                                                                                                                                                                                                                                                                                                                                                                                                                                                                                                                                                                                       |
|-------------------------------|---------------------------------------------------------------------------------------------------------------------------------------------------------------------------------------------------------------------------------------------------------------------------------------------------------------------------------------------------------------------------------------------------------------------------------------------------------------------------------------------------------------------------------------------------------------------------------------------------------------------------------------------------------------------------------------------------------------------------------------------------------------------------------------------------------------------------------------------------------------------------------------------------------------------------------------------------------------------------------------------------------------------------------------------------------------------------------------------------------------------------------------------------------------------------------------------------------------------------------------------------------------------------------------------------------------------------------------------------------------------------------------------------------------------------------------------------------------------------------------------------------------------------------------------------------------------------------------------------------------------------------------------------------------------------------------------------------------------------------------------------------------------------------------------------------------------------------------------------------------------------------------------------------------------------------------------------------------------------------------------------------------------------------------------------------------------------------------------------------------------------------------------------------------------------------------------------------------------------------------------------------------------------------------------------------------------------------------------------------------------------------------------------------------------------------------------------------------------------------------|
| Journal:                      | <i>BMJ Open</i>                                                                                                                                                                                                                                                                                                                                                                                                                                                                                                                                                                                                                                                                                                                                                                                                                                                                                                                                                                                                                                                                                                                                                                                                                                                                                                                                                                                                                                                                                                                                                                                                                                                                                                                                                                                                                                                                                                                                                                                                                                                                                                                                                                                                                                                                                                                                                                                                                                                                       |
| Manuscript ID:                | bmjopen-2012-001124.R1                                                                                                                                                                                                                                                                                                                                                                                                                                                                                                                                                                                                                                                                                                                                                                                                                                                                                                                                                                                                                                                                                                                                                                                                                                                                                                                                                                                                                                                                                                                                                                                                                                                                                                                                                                                                                                                                                                                                                                                                                                                                                                                                                                                                                                                                                                                                                                                                                                                                |
| Article Type:                 | Research                                                                                                                                                                                                                                                                                                                                                                                                                                                                                                                                                                                                                                                                                                                                                                                                                                                                                                                                                                                                                                                                                                                                                                                                                                                                                                                                                                                                                                                                                                                                                                                                                                                                                                                                                                                                                                                                                                                                                                                                                                                                                                                                                                                                                                                                                                                                                                                                                                                                              |
| Date Submitted by the Author: | 15-Apr-2012                                                                                                                                                                                                                                                                                                                                                                                                                                                                                                                                                                                                                                                                                                                                                                                                                                                                                                                                                                                                                                                                                                                                                                                                                                                                                                                                                                                                                                                                                                                                                                                                                                                                                                                                                                                                                                                                                                                                                                                                                                                                                                                                                                                                                                                                                                                                                                                                                                                                           |
| Complete List of Authors:     | <p>Eyre, David; Nuffield Department of Clinical Medicine, University of Oxford, OX3 9DU; NIHR Oxford Biomedical Research Centre, OX3 9DU,<br/> Golubchik, Tanya; Department of Statistics, University of Oxford, OX1 3TG; NIHR Oxford Biomedical Research Centre, OX3 9DU,<br/> Gordon, N Claire; Nuffield Department of Clinical Medicine, University of Oxford, OX3 9DU; NIHR Oxford Biomedical Research Centre, OX3 9DU,<br/> Bowden, Rory; Department of Statistics, University of Oxford, OX1 3TG; NIHR Oxford Biomedical Research Centre, OX3 9DU; Wellcome Trust<br/> Centre for Human Genetics, Oxford, OX3 7BN,<br/> Piazza, Paolo; Wellcome Trust Centre for Human Genetics, Oxford, OX3 7BN,<br/> Batty, Elizabeth; Department of Statistics, University of Oxford, OX1 3TG; NIHR Oxford Biomedical Research Centre, OX3 9DU,<br/> Ip, Camilla; Department of Statistics, University of Oxford, OX1 3TG; NIHR Oxford Biomedical Research Centre, OX3 9DU,<br/> Wilson, Daniel; Department of Statistics, University of Oxford, OX1 3TG; NIHR Oxford Biomedical Research Centre, OX3 9DU,<br/> Didelot, Xavier; Department of Statistics, University of Oxford, OX1 3TG; NIHR Oxford Biomedical Research Centre, OX3 9DU,<br/> O'Connor, Lily; Nuffield Department of Clinical Medicine, University of Oxford, OX3 9DU; Oxford University Hospitals NHS Trust, OX3 9DU,<br/> Lay, Rochelle; Oxford University Hospitals NHS Trust, OX3 9DU,<br/> Buck, David; Wellcome Trust Centre for Human Genetics, Oxford, OX3 7BN,<br/> Kearns, Angela; Health Protection Agency London UK<br/> Shaw, Angela; Ashford and St Peter's NHS Foundation Trust, Department of Microbiology, Surrey, KT16 0PZ,<br/> Paul, John; Health Protection Agency, Royal Sussex County Hospital, BN2 5BE,<br/> Wilcox, Mark; Leeds Teaching Hospitals NHS Trust, Microbiology<br/> Donnelly, Peter; Wellcome Trust Centre for Human Genetics, Oxford, OX3 7BN,<br/> Peto, Tim; Nuffield Department of Clinical Medicine, University of Oxford, OX3 9DU; NIHR Oxford Biomedical Research Centre, OX3 9DU; Oxford University Hospitals NHS Trust, OX3 9DU,<br/> Walker, Ann Sarah; Nuffield Department of Clinical Medicine, University of Oxford, OX3 9DU; NIHR Oxford Biomedical Research Centre, OX3 9DU; Oxford University Hospitals NHS Trust, OX3 9DU; Medical Research Council, Clinical Trials Unit, NW1 2DA,<br/> Crook, Derrick; Nuffield Department of Clinical Medicine, University of</p> |

1  
2  
3  
4  
5  
6  
7  
8  
9  
10  
11  
12  
13  
14  
15  
16  
17  
18  
19  
20  
21  
22  
23  
24  
25  
26  
27  
28  
29  
30  
31  
32  
33  
34  
35  
36  
37  
38  
39  
40  
41  
42  
43  
44  
45  
46  
47  
48  
49  
50  
51  
52  
53  
54  
55  
56  
57  
58  
59  
60

|                                   |                                                                                                                      |
|-----------------------------------|----------------------------------------------------------------------------------------------------------------------|
|                                   | Oxford, OX3 9DU; NIHR Oxford Biomedical Research Centre, OX3 9DU; Oxford University Hospitals NHS Trust, OX3 9DU,    |
| <b>Primary Subject Heading:</b>   | Complementary medicine                                                                                               |
| <b>Secondary Subject Heading:</b> | Infectious diseases                                                                                                  |
| <b>Keywords:</b>                  | Infection control < INFECTIOUS DISEASES, Molecular diagnostics < INFECTIOUS DISEASES, BIOTECHNOLOGY & BIOINFORMATICS |
|                                   |                                                                                                                      |

SCHOLARONE™  
Manuscripts

For peer review only

1  
2  
3 **A pilot study of rapid benchtop sequencing of *Staphylococcus aureus* and**  
4 ***Clostridium difficile* for outbreak detection and surveillance**  
5  
6  
7

8  
9  
10 David W Eyre<sup>1,3</sup>, Tanya Golubchik<sup>2,3</sup>, N Claire Gordon<sup>1,3</sup>, Rory Bowden<sup>2,3,4</sup>, Paolo Piazza<sup>4</sup>,  
11 Elizabeth M Batty<sup>2,3</sup>, Camilla LC Ip<sup>2,3</sup>, Daniel J Wilson<sup>1,4</sup>, Xavier Didelot<sup>2,3</sup>, Lily  
12 O'Connor<sup>1,5</sup>, Rochelle Lay<sup>5</sup>, David Buck<sup>4</sup>, Angela M Kearns<sup>6</sup>, Angela Shaw<sup>7</sup>, John Paul<sup>8</sup>,  
13 Mark H Wilcox<sup>9</sup>, Peter J Donnelly<sup>4</sup>, Tim EA Peto<sup>1,3,5</sup>, A Sarah Walker<sup>1,3,10</sup>, Derrick W  
14 Crook<sup>1,3,5</sup>  
15  
16  
17  
18  
19

20  
21  
22  
23 The following two groups of authors contributed equally to this article, Drs Eyre,  
24 Golubchik, Gordon and Bowden; and Drs Peto, Walker and Crook.  
25  
26  
27

- 28  
29  
30 1. Nuffield Department of Clinical Medicine, University of Oxford, John Radcliffe  
31 Hospital, Oxford, OX3 9DU, United Kingdom  
32  
33 2. Department of Statistics, University of Oxford, 1 South Parks Road, Oxford, OX1 3TG,  
34 United Kingdom  
35  
36 3. NIHR Oxford Biomedical Research Centre, John Radcliffe Hospital, Headley Way  
37 Oxford, OX3 9DU, United Kingdom  
38  
39 4. Wellcome Trust Centre for Human Genetics, Roosevelt Drive, Oxford, OX3 7BN,  
40 United Kingdom  
41  
42 5. Oxford University Hospitals NHS Trust, Headley Way, Oxford, OX3 9DU, United  
43 Kingdom  
44  
45 6. Health Protection Agency Centre for Infections, Staphylococcus Reference Unit  
46 London, NW9 5EQ, United Kingdom  
47  
48  
49  
50  
51  
52  
53  
54  
55  
56  
57  
58  
59  
60



- 1  
2  
3 7. Ashford and St Peter's NHS Foundation Trust, Department of Microbiology, Surrey,  
4  
5 KT16 0PZ, United Kingdom  
6
- 7  
8 8. Health Protection Agency, Royal Sussex County Hospital, Brighton, BN2 5BE, United  
9  
10 Kingdom
- 11  
12 9. Leeds Teaching Hospitals & University of Leeds, Microbiology, Leeds General  
13  
14 Infirmary  
15  
16 Old Medical School, Leeds, LS1 3EX, United Kingdom  
17
- 18  
19 10. Medical Research Council, Clinical Trials Unit, 222 Euston Road, London, NW1 2DA,  
20  
21 United Kingdom  
22  
23  
24  
25  
26  
27  
28  
29  
30  
31  
32  
33  
34  
35  
36  
37  
38  
39  
40  
41  
42  
43  
44  
45  
46  
47  
48  
49  
50  
51  
52  
53  
54  
55  
56  
57  
58  
59  
60

## Abstract

### Objectives

To investigate the prospects of newly-available benchtop sequencers to provide rapid whole genome data in routine clinical practice. Next generation sequencing has the potential to resolve uncertainties surrounding the route and timing of person-to-person transmission of healthcare-associated infection, which has been a major impediment to optimal management.

### Design

We used Illumina MiSeq benchtop sequencing to undertake case studies investigating potential outbreaks of methicillin-resistant *Staphylococcus aureus* (MRSA) and *Clostridium difficile*.

### Setting

Isolates were obtained from potential outbreaks associated with three UK hospitals.

### Participants

Isolates were sequenced from a cluster of eight MRSA carriers and an associated bacteraemia case in an intensive care unit, another MRSA cluster of six cases, and two clusters of *C. difficile*. Additionally, all *C. difficile* isolates from cases over six-weeks in a single hospital were rapidly sequenced and compared with local strain sequences obtained in the preceding three years.

### Main Outcome Measure

Whole genome genetic relatedness of the isolates within each epidemiological cluster.

## Results

Twenty-six MRSA and 15 *C. difficile* isolates were successfully sequenced and analysed within five days of culture. Both MRSA clusters were identified as outbreaks, with most sequences in each cluster indistinguishable and all within three single nucleotide variants (SNVs). Epidemiologically unrelated isolates of the same *spa*-type were genetically distinct ( $\geq 21$  SNVs). In both *C. difficile* clusters closely epidemiologically linked cases (in one case sharing the same strain type) were shown to be genetically distinct ( $\geq 144$  SNVs). A reconstruction applying rapid sequencing in *C. difficile* surveillance provided early outbreak detection and identified previously undetected probable community transmission.

## Conclusions

This benchtop sequencing technology is widely generalizable to human bacterial pathogens. Our findings provide several good examples of how rapid and precise sequencing could transform identification of transmission of healthcare-associated infection, and therefore improve hospital infection control and patient outcomes in routine clinical practice.

## Background

Uncertainty about the exact route and timing of transmission is a major impediment to management of healthcare-associated infection, particularly for endemic pathogens that are also carried commensally, such as *Staphylococcus aureus* and *Clostridium difficile*.

This problem impairs the development and implementation of effective, evidence-based measures for infection control.<sup>1</sup>

High-throughput methods using next-generation sequencing (NGS) are revolutionising bacterial genomics, providing sufficient resolution potentially to determine which cases within temporo-spatial clusters are likely to be related.<sup>2-5</sup> With the advent of rapid sequencers, sources of outbreaks have been identified in clinically relevant timescales, demonstrating the potential of NGS to transform infection control practice.<sup>6-8</sup> The latest benchtop machines offer whole-genome sequencing in a format and at a cost accessible to routine hospital laboratories,<sup>9</sup> but the practical prospects for their use are unclear.

Here we apply benchtop NGS in near real-time to four case studies, and to a surveillance reconstruction, involving two important healthcare-associated pathogens, *S. aureus* and *C. difficile*. We demonstrate how NGS supports identification of outbreaks of closely genetically-related cases, including highlighting potential genetic links between cases not previously known to be related. In other examples we show how NGS can refute transmission between cases that are epidemiologically linked, including between cases sharing the same strain type, indicating the additional benefit benchtop sequencing may provide over existing typing strategies.

## Methods

### *Setting and Patients, Oxford-based case studies*

The Oxford University Hospitals (OUH) NHS Trust comprises 1600 beds across four hospitals, three in Oxford and one 35 miles north in Banbury. It provides >90% of hospital care, and all acute services, to ~600,000 people in Oxfordshire, UK. The OUH microbiology laboratory provides all diagnostic testing for *S. aureus* and *C. difficile* for the region. All cases from three suspected outbreaks between July and October 2011 underwent NGS in parallel with routine infection control investigation (Figure 1). A cluster of carriers of an atypical methicillin-resistant *S. aureus* (MRSA) strain in an intensive care unit (ICU), with an associated bloodstream infection (MRSA cluster 1) was investigated. All *S. aureus* isolates from patients in this ICU in the following month were sequenced, firstly to establish the level of diversity among *S. aureus* isolates from the ICU to provide a comparison with the potential outbreak data, and secondly to confirm control of the MRSA outbreak. Isolates were sequenced irrespective of resistance phenotype. The ICU is a 40 bedded unit offering high-dependency and intensive care. Briefly, baseline infection control interventions included daily environmental cleaning, cleaning of equipment between patients, and use of 'aseptic-non-touch-technique' for all line insertion, use and care. However, MRSA carriers were not routinely isolated. No other MRSA carriers were identified on the ICU in the month prior to the outbreak and only one in the 2 months following. Two clusters of *C. difficile* infection (CDI, *C. difficile* clusters 1 and 2) from a medical ward and an elective surgical unit were also investigated. OUH infection control policy targeting *C. difficile* is described in a previous publication.<sup>10</sup>

### *Setting and Patients, Health Protection Agency Staphylococcus aureus case study*

1  
2  
3 A possible MRSA outbreak reported to the national Health Protection Agency affecting 6  
4 patients in southern England between July and September 2011 was investigated  
5  
6  
7 (Figure 1, MRSA cluster 2). All isolates possessed the *lukS* and *lukF* genes encoding  
8  
9  
10 Panton-Valentine Leukocidin (PVL). Two additional local isolates that shared the same  
11  
12 *staphylococcal protein A (spa)*-type, but without an epidemiological connection to the  
13  
14 cluster, were also included as controls.  
15  
16  
17  
18

### 19 ***Setting and Patients, Oxford-based surveillance reconstruction***

20  
21 To investigate the potential of fast turn-around benchtop sequencing as a surveillance  
22  
23 tool, all CDI cases from one of the OUH hospitals over a six-week period (July-August  
24  
25 2010) were sequenced by MiSeq. Although prepared and sequenced together, samples  
26  
27 were analysed sequentially in the order originally sent to the routine clinical laboratory  
28  
29 to mimic how NGS could support a real infection control investigation. Sequence data  
30  
31 obtained on the Illumina (San Diego, California, USA) GAIIx and HiSeq platforms from  
32  
33 1185 of 1460 samples taken between September 2007 and June 2010 from a previously  
34  
35 described collection of all Oxfordshire CDI cases<sup>10</sup> were available for comparison.  
36  
37  
38  
39  
40

### 41 ***Samples and Sequencing***

42  
43 *S. aureus* isolates were obtained from clinical samples inoculated onto MRSASelect agar  
44  
45 (Bio-Rad, Hemel Hempstead, UK). Antimicrobial sensitivities were determined by disc  
46  
47 diffusion and E-testing per European Committee on Antimicrobial Sensitivity Testing  
48  
49 guidelines.<sup>11</sup> *C. difficile* isolates were identified following selective culture<sup>12</sup> of toxin  
50  
51 enzyme immunoassay-positive diarrhoeal faecal samples.  
52  
53  
54  
55

56  
57 For both organisms, DNA was extracted using a commercial kit (QuickGene, Fujifilm,  
58  
59  
60

1  
2  
3 Tokyo, Japan), from a single colony sub-cultured onto a Columbia blood agar plate and  
4  
5 incubated for 24-48 h. A combination of standard Illumina and adapted protocols was  
6  
7 used to produce multiplexed paired-end libraries (DNA fragments with each sample's  
8  
9 DNA tagged with a unique index). Pools of 4 samples were sequenced at the Wellcome  
10  
11 Trust Centre for Human Genetics, Oxford, UK, using sequencing-by-synthesis  
12  
13 technology,<sup>13</sup> on the Illumina MiSeq platform, generating 150 base paired-end reads.  
14  
15  
16  
17  
18

### 19 ***Sequence Assembly and Analysis***

20  
21 Sequence read data were analysed and assembled using a pipeline developed  
22  
23 specifically for bacterial sequencing, as follows: to measure genome-wide sequence  
24  
25 similarity, the full set of properly-paired reads from each isolate was mapped using  
26  
27 Stampy<sup>14</sup> v1.0.11 (without BWA pre-mapping, using an expected substitution rate of  
28  
29 0.01), to either *S. aureus* MRSA252 (Genbank:NC\_002952)<sup>15</sup> or *C. difficile* 630  
30  
31 (Genbank:AM180355), CD630.<sup>16</sup> Single nucleotide variants (SNVs) were identified  
32  
33 across all mapped non-repetitive sites using SAMtools<sup>17</sup> mpileup, after parameter  
34  
35 tuning based on bacterial sequences. Known mobile genetic elements in CD630 were  
36  
37 excluded from the analysis, as they account for 11% of the genome<sup>16</sup> and exchange of a  
38  
39 single element may result in multiple SNVs in one event. A consensus of at least 75%  
40  
41 was required to support a SNV, and calls were required to be homozygous under a  
42  
43 diploid model. Only SNVs supported by at least 5 reads, including one in each direction,  
44  
45 which did not occur at sites with unusual depth and were not within 12bp of other  
46  
47 variants were accepted. Maximum likelihood trees were estimated from the mapped  
48  
49 whole genomes using PhyML<sup>18</sup> using a Jukes-Cantor model. To identify variation in gene  
50  
51 content, sequence reads were assembled *de novo* using Velvet v1.0.18,<sup>19</sup> with parameter  
52  
53 values optimised to maximise n50 (50% of the assembly in contigs equal to or larger  
54  
55  
56  
57  
58  
59  
60

1  
2  
3 than this value). These assemblies were used to identify antibiotic resistance genes for  
4  
5 *S. aureus* and to determine *in silico* multi-locus sequence types (MLST)<sup>12</sup> for *C. difficile*.  
6  
7

8  
9  
10 To assess both MiSeq data quality and its comparability with existing HiSeq data, the  
11  
12 MRSA252 and CD630 references and one other isolate of each organism were  
13  
14 sequenced on both platforms. Duplicates of two of the *S. aureus* isolates from MRSA  
15  
16 cluster 1 and a MRSA252 sample were run on MiSeq as controls.  
17  
18

### 19 20 21 **Ethics Statement**

22  
23 Ethical approval for sequencing *S. aureus* and *C. difficile* isolates from routine clinical  
24  
25 samples and linkage to patient data without individual patient consent was obtained  
26  
27 from Berkshire Ethics Committee (10/H0505/83) and the UK National Information  
28  
29 Governance Board (8-05(e)/2010). The Health Protection Agency has Patient  
30  
31 Information Advisory Group approval to hold and analyse surveillance data for public  
32  
33 health purposes under Section 60 of the Health and Social Care Act 2001.  
34  
35  
36  
37  
38  
39  
40  
41

### 42 **Findings**

43  
44 Twenty-six *S. aureus* isolates (from 24 patients) and 15 *C. difficile* isolates (15 patients)  
45  
46 (Figure 1) were sequenced using the MiSeq benchtop sequencer, obtaining mean read-  
47  
48 depths of 77.6 and 50.4, respectively, and reference genome coverages of 82.7% and  
49  
50 79.5%, respectively after quality filtering (see Supplementary Figures 1-3 for regions  
51  
52 called; uncalled regions include repetitive regions which, in contrast to Sanger  
53  
54 sequencing, 150bp reads cannot cover, and mobile elements, as well as other non-core  
55  
56 genome). The entire process from commencing DNA extraction to measuring genomic  
57  
58  
59  
60



1  
2  
3 relatedness for each set of sequences was completed within five working days of  
4  
5 culture. No sequence differences were detected in the two pairs of replicates, between  
6  
7 CD630 and MRSA252 and published reference sequences, or between four samples  
8  
9 sequenced both with MiSeq and earlier with HiSeq.  
10

11  
12  
13  
14 ***NGS supports a ward outbreak, despite discordant antimicrobial and strain typing***  
15 ***data (MRSA cluster 1: Figure 2A,B)***  
16

17  
18 Ten MRSA isolates obtained from eight patients from the same ICU over four months  
19  
20 belonged to the same *spa*-type (t5973) and were indistinguishable by pulsed-field gel  
21  
22 electrophoresis (PFGE). Ward stays and the first positive isolate per patient are shown  
23  
24 in Figure 2B. The extreme rarity of this *spa*-type in the UK (no t5973 isolates held by the  
25  
26 National Reference Laboratory), and the fact they exhibited indistinguishable PFGE  
27  
28 types, would normally be considered sufficient evidence for an outbreak. However, the  
29  
30 isolates showed methicillin heteroresistance (which impaired initial detection of the  
31  
32 outbreak) and differed in penicillin and tetracycline sensitivity (Table 1); no common  
33  
34 source was identified, casting doubt on the connection between the first seven cases  
35  
36 and with the bloodstream infection, which occurred after a further 8 weeks, but in the  
37  
38 absence of any contemporaneous patient MRSA isolates.  
39  
40  
41  
42  
43  
44

45  
46 No sequence differences were detected in the mapped genomes between isolates from 6  
47  
48 of the carriage cases (A,B,C,D,F,G); case E differed at a single site. The 2 isolates (nasal  
49  
50 swab and blood culture) from the bloodstream infection case (H), were  
51  
52 indistinguishable and differed by three SNVs from the other cases. Given previous  
53  
54 estimated rates of short-term *S. aureus* evolution of 9.6 (95% confidence interval 7.3-  
55  
56 11.6)<sup>4</sup> and 7.9 (95% credibility interval 4.8-12.8)<sup>20</sup> SNVs/genome/year these data are  
57  
58  
59  
60

1  
2  
3 consistent with recent acquisition from a common source. In contrast, the mean number  
4  
5 of SNVs between all pairs of *S. aureus* isolates from the same unit from the following  
6  
7 month was 7541 (Figure 2A). All the outbreak cases (A-H) were *mecA* positive by PCR  
8  
9 and sequencing; however, two plasmids not present in MRSA252, encoding the *blaZ* and  
10  
11 *tetK* genes, were detected in seven and five of the isolates, respectively. These genotypic  
12  
13 findings matched the phenotypic susceptibility results (Table 1).  
14  
15  
16  
17  
18

19 As sequencing data provided support for an outbreak, and this directly led to  
20  
21 implementation (and escalation with subsequent cases) of intensive infection control  
22  
23 supervision of the unit with visits up to 4-5 times per day. Observations made resulted  
24  
25 in retraining for medical and nursing staff covering administration of intravenous  
26  
27 medication and taking blood cultures. Additionally, isolation of all MRSA carriers was  
28  
29 implemented and reinforced.  
30  
31  
32  
33  
34

35 ***NGS supports transmission of isolates during short periods of shared ward***  
36  
37 ***exposure (MRSA cluster 2; Figure 2C,D)***  
38

39 Six PVL-positive MRSA isolates were identified over three months. Five had been  
40  
41 inpatients on the same ward (Q,R,S,T,V) (with overlapping stays of 1-2 days in 4 cases)  
42  
43 and one (U) was a relative of V. All were *spa*-type t657, which, although relatively rare,  
44  
45 has occurred sporadically in this region. The isolates were also indistinguishable by  
46  
47 PFGE. Therefore, given the prolonged timescale, it was unclear whether these cases  
48  
49 reflected a genuine outbreak or background circulation of related organisms. In fact,  
50  
51 only one SNV was detected among all six samples, indicating a recent common source.  
52  
53 Whereas, two isolates originating from the same geographical area and with the same  
54  
55 *spa* and susceptibility profiles, but with slightly different PFGE types and no known  
56  
57  
58  
59  
60

1  
2  
3 epidemiological link, differed from the main cluster at 21 and 37 sites, respectively. The  
4  
5 sites were distributed throughout the genome ruling out a single recombination event  
6  
7 accounting for all the differences (Supplementary Figure 1). Additionally, no variant  
8  
9 sites were detected within the *mutS*, *mutS2*, *mutL* genes associated with  
10  
11 hypermutation.<sup>21</sup> The SNV differences are therefore consistent with a shared ancestry  
12  
13 two to five years earlier.  
14  
15

16  
17  
18  
19 ***NGS refutes transmission between suspected linked cases (C. difficile cluster 1;***  
20  
21 **Figure 3A,B)**

22  
23 The OUH infection control service identified three CDI cases (B,C,D) occurring over four  
24  
25 days among inpatients on the same ward. While UK Department of Health guidance<sup>22</sup>  
26  
27 states that a cluster should only be considered an “outbreak” when the cases share a  
28  
29 strain type (e.g. by MLST or PCR-ribotyping), such information is slow to obtain. In  
30  
31 practice, therefore, such clusters are treated as presumptive outbreaks requiring  
32  
33 intensive management. Sequencing showed that all three cases had different  
34  
35 computationally predicted sequence types (STs, ST2, ST10 and ST37) and differed at  
36  
37 >4000 sites distributed throughout the genome (Supplementary Figure 2). With short-  
38  
39 term *C. difficile* evolution rates estimated from serial sampling of 91 patients with  
40  
41 samples taken between 1 day and 561 days apart at 2.3 SNVs/genome/year (95%  
42  
43 credibility interval 1.6-3.0). (Xavier Didelot, personal communication 20 January 2012,  
44  
45 manuscript under review), recent transmission between these cases can be excluded  
46  
47 with confidence. However, a fourth case (A) that occurred 12 days previously, and was  
48  
49 not initially included in the infection control investigation, was indistinguishable from  
50  
51 case B; case A was found to have been in an adjacent side room to case B, strongly  
52  
53 suggesting ward-based transmission. Presentation of this sequencing data backed  
54  
55  
56  
57  
58  
59  
60

1  
2  
3 transmission event to an outbreak review meeting, resulted in a detailed infection  
4 control audit, which in turn led to markedly improved cleaning of equipment.  
5  
6  
7

8  
9  
10 ***NGS demonstrates that isolates of the same strain type are not necessarily linked by***  
11 ***transmission (C. difficile cluster 2; Figure 3C,D)***  
12

13  
14 Three CDI cases (F,G,H) occurring over a three-week period in an elective surgical unit  
15 were suggestive of transmission, since the most recent previous CDI (E) had occurred  
16 six months before. However, isolates from the three cases were sufficiently genomically  
17 diverse to rule out transmission. Notably, two isolates shared a sequence type (ST5)  
18 under the strain-typing scheme used in OUH, but differed at 144 sites distributed  
19 throughout the genome (Supplementary Figure 3), providing an example of the extra  
20 discriminatory power of sequencing over existing typing schemes in ruling out  
21 transmission.  
22  
23  
24  
25  
26  
27  
28  
29  
30  
31  
32  
33

34  
35 ***NGS-based C. difficile surveillance, a reconstruction***  
36

37 All seven CDI cases occurring in one OUH hospital over six weeks were sequenced on  
38 the MiSeq platform and compared with each other and with a 'historical' sequence  
39 database comprising 1185 isolates from regional CDI cases occurring in the previous  
40 three years.  
41  
42  
43  
44  
45  
46  
47

48 Four of the seven cases (ST3) formed a genetic cluster containing variation at only two  
49 SNVs, indicating probable transmission; these cases shared time and space on the same  
50 ward around their CDI. The genetically most similar historical CDI case differed from  
51 the four genetically clustered cases at three SNVs (Figure 4); however, it occurred three  
52  
53  
54  
55  
56  
57  
58  
59  
60

1  
2  
3 years earlier and 30 miles away. Therefore, no direct relationship could be discerned  
4  
5 between historical cases and the current outbreak.  
6  
7

8  
9  
10 The three remaining cases in the group of seven reconstruction cases (representing  
11  
12 ST1, ST11 and ST13) differed from the other four cases and from each other at >3000  
13  
14 SNVs. The overall mean pairwise SNV difference between all reconstruction cases was  
15  
16 13012 SNVs. One individual (ST1, ribotype-027), diagnosed on the day of admission and  
17  
18 last admitted eight months previously, yielded a *C. difficile* sequence indistinguishable  
19  
20 from 11 previous CDI cases, including local strains from 6 months previously. Since this  
21  
22 patient had not shared inpatient time with any of the other cases, and most of the  
23  
24 genetically related cases had occurred outside of OUH hospitals, this may represent  
25  
26 previously unsuspected community-based transmission, which could have been  
27  
28 investigated had sequence information been available in 2010. No plausible hospital or  
29  
30 community patient source could be identified for the other two cases; however,  
31  
32 previous cases differing from them at four to ten SNVs were identified in the previous  
33  
34 six months to three years, consistent with a local strain origin.  
35  
36  
37  
38  
39  
40  
41  
42

### 43 **Discussion**

44  
45  
46 This study provides strong evidence in two major healthcare-associated pathogens, *S.*  
47  
48 *aureus* and *C. difficile*, that benchtop sequencing can enhance hospital infection control  
49  
50 through high precision support and rejection of transmission using genetic data. We  
51  
52 also show this technology offers turnaround times of under a week in a format that, in  
53  
54 contrast to molecular typing, is organism-independent.  
55  
56  
57  
58  
59  
60

1  
2  
3 The results obtained in this study were obtained quickly enough to influence cluster  
4 investigations and in the outbreaks described were used to inform the hospital's  
5 response. Where suspected transmission events were supported by sequencing data in  
6 two of the outbreaks infection control supervision of measures to prevent case-to-case  
7 spread was significantly enhanced. In contrast increases in incidence without  
8 transmission between infected patients still merit a response, for example clusters of  
9 genetically unrelated *C. difficile* cases on wards have prompted a review in our hospitals  
10 of antibiotic use and guidance. If such clusters were identified in patients with *S. aureus*  
11 infection this might prompt, for example, review of line care, or peri-operative care. Had  
12 the set of cases in the *C. difficile* surveillance reconstruction been sequenced in real  
13 time, an outbreak would have become apparent after the second case, and it is possible  
14 that subsequent transmissions might have been prevented, particularly as compliance  
15 with infection control measures was incomplete at the time of the outbreak. Clearly  
16 formal evaluation of the use of the technology in an appropriately controlled trial is  
17 needed to determine the extent to which the control of these outbreaks was, or would  
18 have been, enhanced by the availability of sequence data.  
19  
20  
21  
22  
23  
24  
25  
26  
27  
28  
29  
30  
31  
32  
33  
34  
35  
36  
37  
38  
39  
40

41 Whole-genome sequencing provides the ultimate resolution of genetic relationships.  
42 This offers two clear benefits for inference of transmission events. Firstly, putative  
43 transmission events between genetically very distinct isolates can be refuted with  
44 confidence. This is of particular value by comparison with widely used current typing  
45 strategies that are unable to distinguish isolates belonging to a prevalent strain type; for  
46 example PCR-ribotype-027 (NAP-1) accounts for ~35% of *C. difficile* strains in UK and  
47 N. American hospitals.<sup>23 24</sup> Secondly, close genetic relationships combined with clinical  
48 and epidemiological evidence can provide strong evidence in favour of a putative  
49  
50  
51  
52  
53  
54  
55  
56  
57  
58  
59  
60

1  
2  
3 transmission event, justifying infection control intervention, as detailed above. Notably,  
4  
5 a genetic match in the absence of an obvious epidemiological link may legitimately  
6  
7 prompt investigation of new routes of transmission, such as the possible community  
8  
9 transmission identified in our *C. difficile* surveillance reconstruction. However, close  
10  
11 genetic links cannot be used in isolation to confirm transmission. For example, we  
12  
13 identified genetically similar cases separated by both time and space, emphasising the  
14  
15 importance of analysing genetic data alongside epidemiological information. The main  
16  
17 limitation of this study is it is not large enough to provide a formal comparison with  
18  
19 existing technology including a health economic evaluation. Additionally, although we  
20  
21 used the Illumina MiSeq platform other similar benchtop technology exists, e.g. Ion  
22  
23 Torrent (Life Technologies, Connecticut, USA), or is under development, e.g. Oxford  
24  
25 Nanopore (Oxford Nanopore Technologies, Oxford, UK).  
26  
27  
28  
29  
30  
31

32 NGS technology is widely generalizable to human bacterial pathogens,<sup>25</sup> and has been  
33  
34 used previously to investigate transmission of infectious disease.<sup>2-5</sup> Although the  
35  
36 benefits of rapid sequencers have been shown in high profile national outbreaks<sup>6-8</sup> we  
37  
38 provide the first demonstration of rapid sequencing in a benchtop format applied to  
39  
40 routine patient care and healthcare-associated pathogens. Existing typing schemes, such  
41  
42 as *spa*, PFGE, PCR-ribotyping, and MLST, have established a framework in the  
43  
44 application of genetic data in outbreak investigation. However, the organism-specific  
45  
46 application of these strain-typing methods, often requiring isolates to be sent to a  
47  
48 specific reference laboratory, in practice means that many infection clusters remain  
49  
50 untyped. Benchtop sequencing builds upon existing typing expertise, offering rapidly  
51  
52 available and increased resolution data from an organism-independent platform. This  
53  
54 means that a single technology will provide the capacity for individual hospital  
55  
56  
57  
58  
59  
60

1  
2  
3 laboratories to support outbreak investigation for a range of pathogens, and allow  
4  
5 infection control personnel to efficiently target resources to genuine outbreaks. With  
6  
7 the cost of sequencing falling rapidly,<sup>26 27</sup> and the prospect within 12 months of  
8  
9 obtaining complete accurate pathogen sequences in hours, and for as little as US\$10 per  
10  
11 sequence,<sup>28</sup> it is likely that benchtop sequencing will soon be comparable in price to  
12  
13 existing molecular typing, while offering considerable additional benefits. As well as  
14  
15 identifying transmissions, the reproducible and digital nature of locally generated  
16  
17 sequence data make these ideal for sharing in national and potentially international  
18  
19 surveillance, for sequence-based resistance prediction, and for precise, generic species  
20  
21 identification.<sup>25</sup>  
22  
23  
24  
25  
26  
27

28 The case studies in this pilot study provide a clear rationale for future work undertaking  
29  
30 formal comparisons of benchtop NGS with existing local and national typing schemes.  
31  
32 Such comparisons will need to include formal health-economic assessments that  
33  
34 account for the capital expense of establishing benchtop NGS equipment and expertise  
35  
36 in a laboratory, as well as the potential cost-savings associated with more focused  
37  
38 cluster investigation, and infection control interventions. The improved accuracy in  
39  
40 identifying within hospital transmission should also lead to better metrics of hospital  
41  
42 infection control performance – and provide an opportunity for further reductions in  
43  
44 the incidence of healthcare-associated infections and hence improvements in patient  
45  
46 outcomes.  
47  
48  
49  
50  
51  
52  
53  
54  
55  
56  
57  
58  
59  
60



## Acknowledgements

We thank Margot Nicholls and Angela Iversen from Surrey and Sussex Health Protection Unit for providing epidemiological details. We thank David Griffiths and Alison Vaughan for assistance with sample preparation, and the Oxford MRC High Throughput Sequencing Hub team.

## Funding

This study was supported by the NIHR Oxford Biomedical Research Centre and the UKCRC Modernising Medical Microbiology Consortium, the latter funded under the UKCRC Translational Infection Research Initiative supported by Medical Research Council, Biotechnology and Biological Sciences Research Council and the National Institute for Health Research on behalf of the Department of Health (Grant G0800778) and the Wellcome Trust (Grant 087646/Z/08/Z). We acknowledge the support of Wellcome Trust core funding (Grant 090532/Z/09/Z). TEAP and DWC are NIHR Senior Investigators. DWE is a NIHR Doctoral Research Fellow.

## Author contributions

All authors were involved in critical review of the manuscript and have seen and approved the final version. Specific contributions as follows: study conception and design: DWC, TEAP, ASW, PJD, RB, MHW, JP; sample acquisition: LO, RL, NCG, AMK, AS, JP; sample sequencing: PP, DB; sequence data processing pipeline: RB, TG, EMB, CLCI; analysis of epidemiological and sequence data: DWE, TG, NCG, DJW, XD, TEAP, ASW, DWC; drafting the manuscript: DWE, NCG, TG, ASW, TP, DWC. The following two groups of authors contributed equally to this article, DWE, TG, NCG and RB; and TEAP, ASW and

1  
2  
3 DWC. All authors had full access to all the study data and take responsibility for the  
4  
5 integrity of the data and the accuracy of the data analysis. DWC is the guarantor.  
6  
7

### 8 9 **Conflicts of Interest**

10 All authors have completed the Unified Competing Interest form  
11  
12 at [www.icmje.org/coi\\_disclosure.pdf](http://www.icmje.org/coi_disclosure.pdf) (available on request from the corresponding  
13  
14 author). The institution of DWC and TEAP received per-case funding from Optimer  
15  
16 Pharmaceuticals to support fidaxomicin trial patient expenses. DWC and TEAP also  
17  
18 received honoraria from Optimer Pharmaceuticals for participation in additional  
19  
20 meetings related to investigative planning for fidaxomicin. MHW has received honoraria  
21  
22 for consultancy work, financial support to attend meetings and research funding from  
23  
24 bioMerieux, Optimer, Novacta, Pfizer, Summit, The Medicines Company, Viropharma,  
25  
26 and Astellas. No other author has a conflict of interest.  
27  
28  
29  
30  
31  
32  
33  
34

### 35 **Data sharing**

36  
37 The sequences reported in this paper have been deposited in the European Nucleotide  
38  
39 Archive Sequence Read Archive under study accession  
40  
41 number ERP001413 (<http://www.ebi.ac.uk/ena/data/view/ERP001413>).  
42  
43  
44  
45

### 46 **Exclusive Licence**

47  
48 The Corresponding Author has the right to grant on behalf of all authors and does grant  
49  
50 on behalf of all authors, an exclusive licence (or non exclusive for government  
51  
52 employees) on a worldwide basis to the BMJ Publishing Group Ltd to permit this article  
53  
54 (if accepted) to be published in BMJ editions and any other BMJ PGL products and  
55  
56 sublicences such use and exploit all subsidiary rights, as set out in our licence.  
57  
58  
59  
60

| Patient | Sample date | Antibiotic susceptibility |       |              |       | Gene presence/absence |      |
|---------|-------------|---------------------------|-------|--------------|-------|-----------------------|------|
|         |             | Penicillin                |       | Tetracycline |       | blaZ                  | tetK |
|         |             | DD                        | MIC   | DD           | MIC   |                       |      |
| A       | 25/7        | R                         | 2     | S            | 0.094 | +                     | -    |
| B       | 27/7        | R                         | 2     | R            | 24    | +                     | +    |
| C       | 27/7        | R                         | 4     | S            | 0.094 | +                     | -    |
| D (i)   | 5/8         | R                         | 3     | R            | 24    | +                     | +    |
| D (ii)  | 10/8        | R                         | 2     | R            | 24    | +                     | +    |
| E       | 8/8         | R                         | 4     | R            | 32    | +                     | +    |
| F       | 8/8         | S                         | 0.047 | S            | 0.064 | -                     | -    |
| G       | 8/8         | R                         | 3     | S            | 0.094 | +                     | -    |
| H(i)    | 28/9        | R                         | 4     | R            | 24    | +                     | +    |
| H(ii)*  | 29/9        | R                         | 2     | R            | 24    | +                     | +    |

**Table 1. MRSA Cluster 1, comparison of antibiotic susceptibility and associated genetic elements.** DD: disc diffusion (R: resistant; S: susceptible), MIC: minimum inhibitory concentration (mg/litre). Screening swabs were obtained from patient D on two separate dates. All isolates were methicillin heteroresistant, appearing susceptible on routine testing despite detection of *mecA* by PCR and sequencing. This explains why isolate F appeared phenotypically penicillin susceptible on disc diffusion and E-testing. The mechanism of heteroresistance for these isolates has not yet been fully elucidated although the penicillin-susceptible-methicillin-resistant phenotype has been described.<sup>29</sup> \*The second isolate from patient H is a from a positive blood culture.

## References

1. Forder A. A brief history of infection control - past and present. *S Afr Med J*. 2007;97(11):1161-1164.
2. Gardy JL, Johnston JC, Ho Sui SJ, et al. Whole-genome sequencing and social-network analysis of a tuberculosis outbreak. *New Engl J Med*. 2011;364(8):730-739.
3. Lieberman TD, Michel J-B, Aingaran M, et al. Parallel bacterial evolution within multiple patients identifies candidate pathogenicity genes. *Nat Genet*. 2011;43(12):1275-1280.
4. Harris SR, Feil EJ, Holden MTG, et al. Evolution of MRSA During Hospital Transmission and Intercontinental Spread. *Science*. 2010;327(5964):469-474.
5. Reeves PR, Liu B, Zhou Z, et al. Rates of mutation and host transmission for an *Escherichia coli* clone over 3 years. *PLoS ONE*. 2011;6(10):e26907.
6. Chin C-S, Sorenson J, Harris JB, et al. The origin of the Haitian cholera outbreak strain. *New Engl J Med*. 2011;364(1):33-42.
7. Rasko DA, Webster DR, Sahl JW, et al. Origins of the *E. coli* strain causing an outbreak of hemolytic-uremic syndrome in Germany. *New Engl J Med*. 2011;365(8):709-717.
8. Rohde H, Qin J, Cui Y, et al. Open-source genomic analysis of Shiga-toxin-producing *E. coli* O104:H4. *New Engl J Med*. 2011;365(8):718-724.
9. Mellmann A, Harmsen D, Cummings CA, et al. Prospective genomic characterization of the German enterohemorrhagic *Escherichia coli* O104:H4

- 1  
2  
3 outbreak by rapid next generation sequencing technology. *PLoS ONE*.  
4  
5 2011;6(7):e22751.  
6
- 7 **10.** Walker AS, Eyre DW, Wyllie DH, et al. Characterisation of *Clostridium difficile*  
8  
9 Hospital Ward-based Transmission Using Extensive Epidemiological Data and  
10  
11 Molecular Typing. *PLoS Med*. 2012;9(2):e1001172:1001171-1001112.  
12  
13
- 14 **11.** European Committee on Antimicrobial Susceptibility Testing  
15  
16 Breakpoint tables for interpretation of MICs and zone diameters, version 2.0  
17  
18 [http://www.eucast.org/fileadmin/src/media/PDFs/EUCAST\\_files/Disk\\_test\\_doc](http://www.eucast.org/fileadmin/src/media/PDFs/EUCAST_files/Disk_test_documents/EUCAST_breakpoints_v_2.0_120101.pdf)  
19  
20 [uments/EUCAST\\_breakpoints\\_v\\_2.0\\_120101.pdf](http://www.eucast.org/fileadmin/src/media/PDFs/EUCAST_files/Disk_test_documents/EUCAST_breakpoints_v_2.0_120101.pdf). Accessed January 20, 2012.  
21  
22
- 23 **12.** Griffiths D, Fawley W, Kachrimanidou M, et al. Multilocus sequence typing of  
24  
25 *Clostridium difficile*. *J Clin Microbiol*. 2010;48(3):770-778.  
26  
27
- 28 **13.** Bentley DR, Balasubramanian S, Swerdlow HP, et al. Accurate whole human  
29  
30 genome sequencing using reversible terminator chemistry. *Nature*.  
31  
32 2008;456(7218):53-59.  
33  
34
- 35 **14.** Lunter G, Goodson M. Stampy: A statistical algorithm for sensitive and fast  
36  
37 mapping of Illumina sequence reads. *Genome Res*. 2011;21(6):936-939.  
38  
39
- 40 **15.** Holden MTG, Feil EJ, Lindsay JA, et al. Complete genomes of two clinical  
41  
42 *Staphylococcus aureus* strains: evidence for the rapid evolution of virulence and  
43  
44 drug resistance. *Proc Natl Acad Sci U S A* 2004;101(26):9786-9791.  
45
- 46 **16.** Sebahia M, Wren BW, Mullany P, et al. The multidrug-resistant human pathogen  
47  
48 *Clostridium difficile* has a highly mobile, mosaic genome. *Nature Gen*.  
49  
50 2006;38(7):779-786.  
51  
52
- 53 **17.** Li H, Handsaker B, Wysoker A, et al. The Sequence Alignment/Map format and  
54  
55 SAMtools. *Bioinformatics*. 2009;25(16):2078-2079.  
56  
57  
58  
59  
60

- 1  
2  
3 18. Guindon S, Gascuel O. A simple, fast, and accurate algorithm to estimate large  
4 phylogenies by maximum likelihood. *Syst Biol.* 2003;52(5):696-704.  
5  
6
- 7 19. Zerbino DR, Birney E. Velvet: Algorithms for de novo short read assembly using  
8 de Bruijn graphs. *Genome Res.* 2008;18(5):821-829.  
9
- 10 20. Young BC, Golubchik T, Batty EM, et al. Evolutionary dynamics of *Staphylococcus*  
11 *aureus* during progression from carriage to disease. *Proc Natl Acad Sci U S A.*  
12 2012;109(12):4550-4555.  
13  
14
- 15 21. Prunier AL, Leclercq R. Role of *mutS* and *mutL* Genes in Hypermutability and  
16 Recombination in *Staphylococcus aureus*. *J Bacteriol.* 2005;187(10):3455-3464.  
17  
18
- 19 22. Department of Health. *Clostridium difficile* infection: How to deal with the  
20 problem. 2009  
21  
22
- 23 23. Dingle KE, Griffiths D, Didelot X, et al. Clinical *Clostridium difficile*: clonality and  
24 pathogenicity locus diversity. *PLoS ONE.* 2011;6(5):e19993.  
25  
26
- 27 24. Louie TJ, Miller MA, Mullane KM, et al. Fidaxomicin versus vancomycin for  
28 *Clostridium difficile* infection. *New Engl J Med.* 2011;364(5):422-431.  
29  
30
- 31 25. Relman DA. Microbial genomics and infectious diseases. *N Engl J Med* 2011; 365:  
32 347-357.  
33  
34
- 35 26. The Sequence Explosion. *Nature.* Apr 30 2010;464:671-672.  
36  
37
- 38 27. Metzker ML. Sequencing technologies — the next generation. *Nat Rev Genet.*  
39 2009;11(1):31-46.  
40  
41
- 42 28. Nature News. Nanopore genome sequencer makes its debut.  
43  
44  
45  
46  
47  
48  
49  
50  
51  
52  
53  
54  
55  
56  
57  
58  
59  
60  
<http://www.nature.com/news/nanopore-genome-sequencer-makes-its-debut-1.10051> doi:10.1038/nature.2012.10051. Accessed February 22, 2012.

- 1  
2  
3 29. Blanc DS, Petignat C, Moreillon P, et al. Unusual spread of a penicillin-susceptible  
4 methicillin-resistant *Staphylococcus aureus* clone in a geographic area of low  
5 incidence. *Clin Infect Dis*. 1999;29(6):1512-1518.  
6  
7  
8  
9  
10  
11  
12  
13  
14  
15  
16  
17  
18  
19  
20  
21  
22  
23  
24  
25  
26  
27  
28  
29  
30  
31  
32  
33  
34  
35  
36  
37  
38  
39  
40  
41  
42  
43  
44  
45  
46  
47  
48  
49  
50  
51  
52  
53  
54  
55  
56  
57  
58  
59  
60

For peer review only

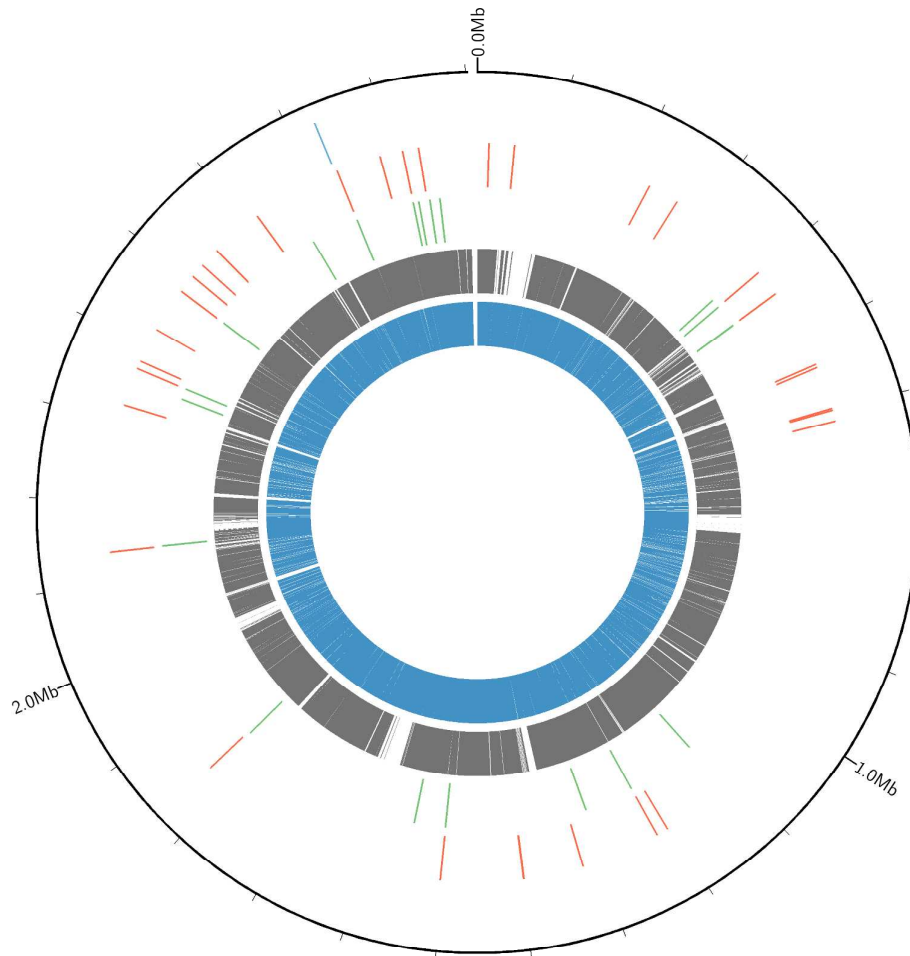

**Supplementary Figure 1. Location of variable sites in MRSA cluster 2.**

Circular plot of *S. aureus* genome. From inner ring to outer: inner ring (blue) showing coding regions of the MRSA252 reference genome; (grey) regions of MRSA252 called in case Q; (green) location of observed variable sites in case W relative to case Q, each variable site shown as a line; (red) location of variable sites in case X relative to case Q; outer ring (blue) location of the variable site in case U relative to case Q.



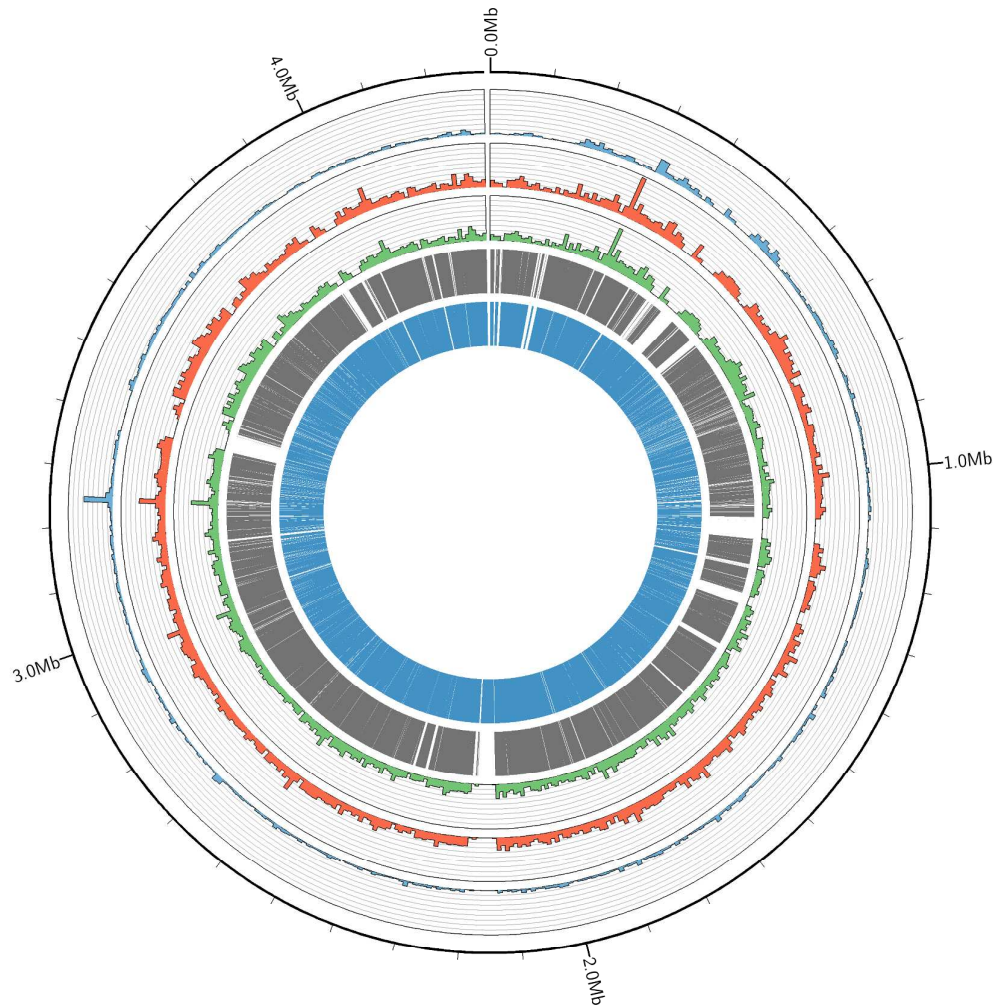

**Supplementary Figure 2. Location of variable sites in *C. difficile* cluster 1.** Circular plot of *C. difficile* genome. From inner ring to outer: inner ring (blue) showing coding regions of the 630 reference genome; (grey) regions of 630 called in case D; (green) frequency histogram of location of observed variable sites in case A relative to case D; (red) frequency histogram of location of variable sites in case B relative to case D; outer ring (blue) frequency histogram of location of variable sites in case C relative to case D.

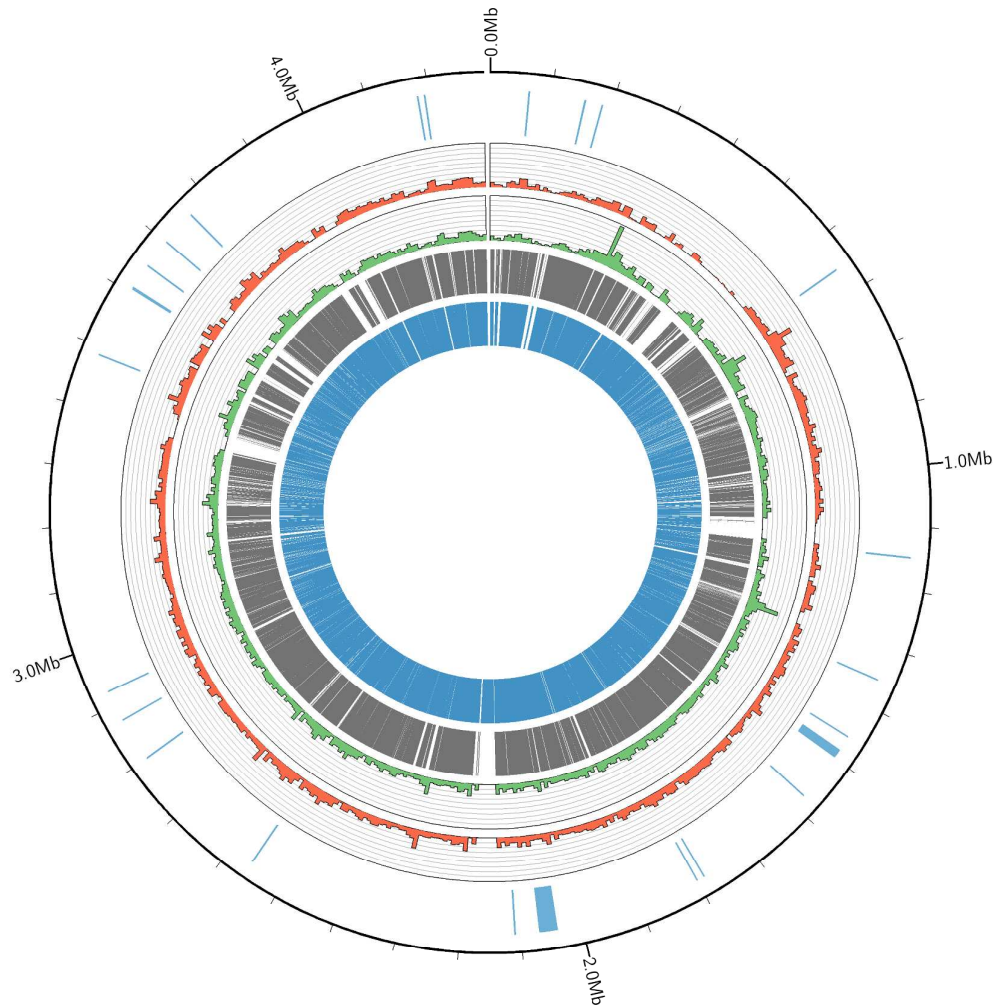

**Supplementary Figure 3. Location of variable sites in *C. difficile* cluster 2.**

Circular plot of *C. difficile* genome. From inner ring to outer: inner ring (blue) showing coding regions of the 630 reference genome; (grey) regions of 630 called in case F; (green) frequency histogram of location of observed variable sites in case H relative to case F; (red) frequency histogram of location of variable sites in case E relative to case F; outer ring (blue) location of variable sites in case G relative to case F, each variable site shown as a line.

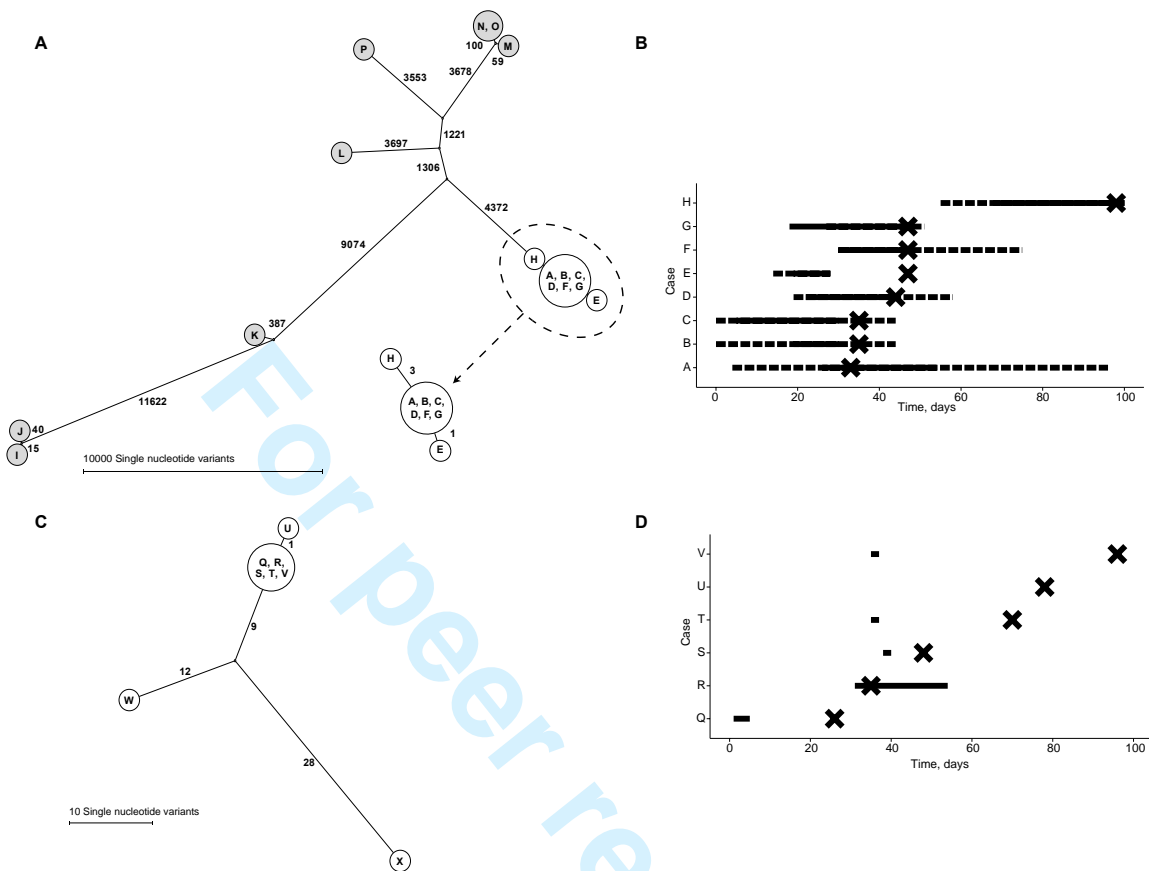

**Figure 2. *S. aureus* cluster genetic and epidemiological relationships. Panel A-B,**

**MRSA cluster 1 and related MSSA isolates. Panel C-D, MRSA cluster 2.** Panel A shows all isolates from MRSA cluster 1 (white circles) and all *S. aureus* isolates from the following month (grey circles, all methicillin sensitive). The left panels show the genetic relationships between cases as maximum likelihood trees, labelled with the number of SNVs at which samples differ. Genetically indistinguishable samples are shown in the same circle. The right panels show time spent on the same ward as a horizontal line for each case in both clusters. In panel B the dashed line indicates time on the same ward, and the solid line time in the same bay. In panel D the solid line indicates time spent on the same ward. The timing of the first nucleotide positive sample for each case is indicated with a cross. Case H subsequently developed a bloodstream infection.

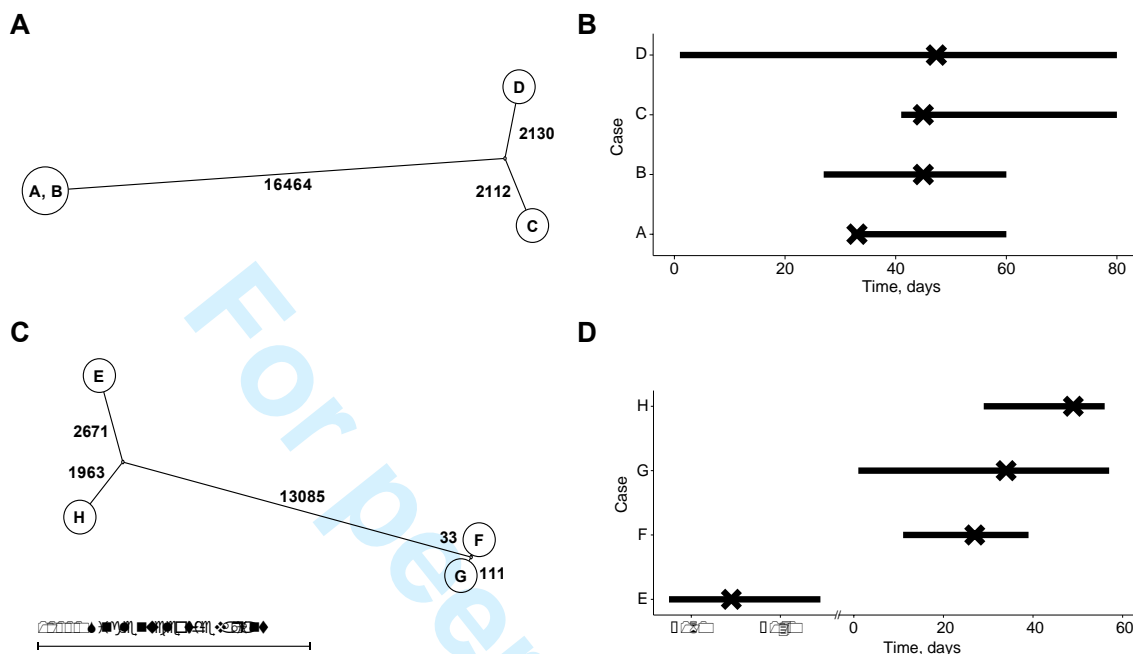

**Figure 3. *C. difficile* cluster genetic and epidemiological relationships. Panel A-B, *C. difficile* cluster 1. Panel C-D, *C. difficile* cluster 2.** The left panels show the genetic relationships between cases as maximum likelihood trees, labelled with the number of SNVs at which samples differ. Genetically indistinguishable cases are shown in the same circle. The right hand panels (B, D) show time spent on the same ward as a horizontal line for each case. The timing of the first positive sample for each case is indicated with a cross.

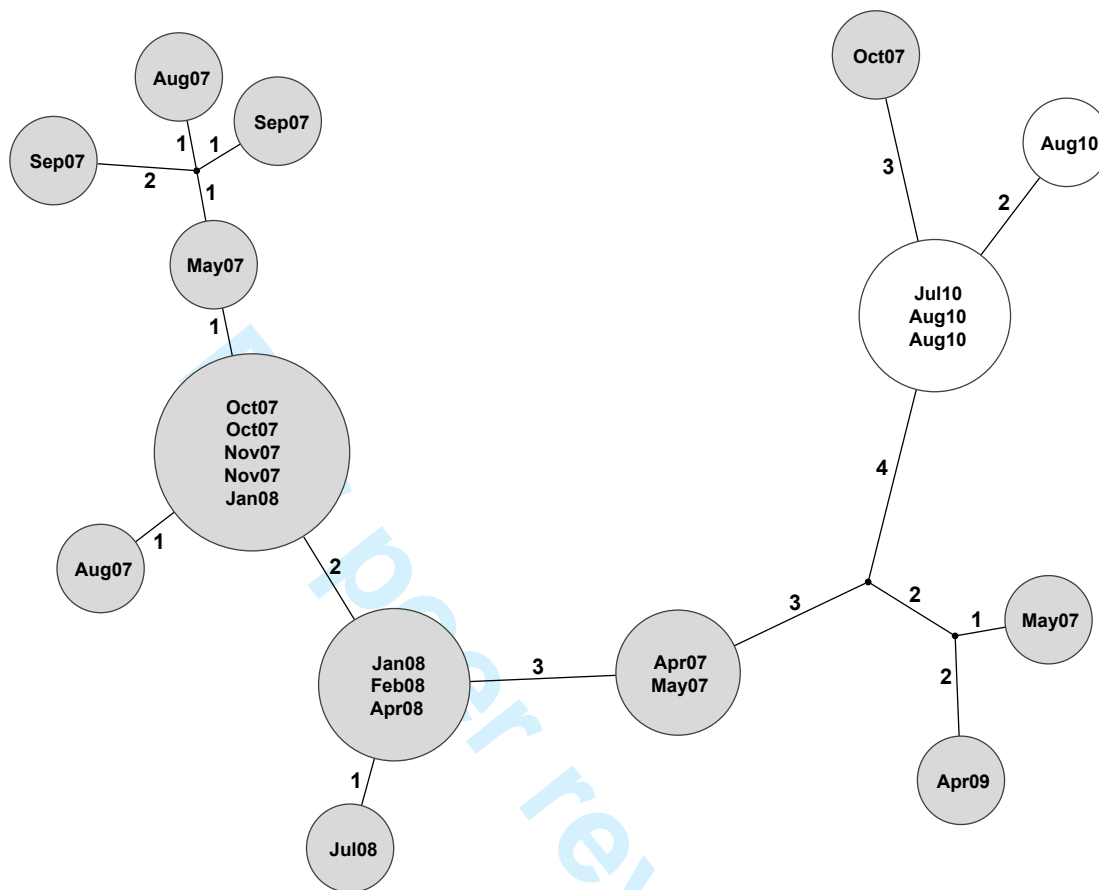

**Figure 4. Potential for whole-genome sequencing to enhance *C. difficile* surveillance.**

Genetic relationships between cases are shown as a maximum likelihood tree, labelled with the number of SNVs at which samples differ. Genetically indistinguishable cases are shown in the same circle. Cases from an existing database of sequenced isolates are shown in grey circles with the date of isolation. Four cases arising during a six-week surveillance reconstruction are shown in white circles. Three additional cases sequenced as part of the reconstruction differed at >3000 SNVs from the cases shown and are not shown in the figure. The maximum likelihood tree shown is consistent with data, however homoplasy was observed in one of the variant sites, 2464157 in the CD630 reference genome.

**MRSA Cluster 1**

10 isolates (8 patients), obtained in an intensive care unit, July – September 2011

- 8 nasal screening swabs, from 7 patients, positive over 2 weeks [*S. aureus* cases A-G]
- 1 blood culture and 1 nasal swab from bacteraemic patient 8 weeks later [*S. aureus* case H]

All 8 methicillin-sensitive *S. aureus* isolates from the same unit in October 2011 also sequenced to confirm outbreak control (and assess background diversity)

- 8 nasal screening swabs [*S. aureus* cases I-P]

***C difficile* Cluster 1**

4 CDI cases within 17 days, same ward (medical specialty), September – October 2011

- 4 stool samples [*C. difficile* cases A-D]

***C difficile* Cluster 2**

3 CDI cases within 22 days, same unit (elective surgical specialty), September – October 2011, preceding CDI case also sequenced

- 4 stool samples [*C. difficile* cases E-H]

**MRSA Cluster 2**

6 Health Protection Agency isolates associated with a single hospital, July – September 2011

- 3 caesarian section wound infection wound swabs [*S. aureus* cases Q, R, S]
- 1 breast abscess – aspirate [*S. aureus* case T]
- 1 finger abscess – aspirate [*S. aureus* case U]
- 1 nasal swab (case family member) [*S. aureus* case V]

2 unrelated cases sharing the same *spa* type included for comparison

- [*S. aureus* cases W, X]

***C difficile* Surveillance**

All 7 CDI cases in a single hospital over 6 weeks, July – August 2010 sequenced and compared with previously sequenced isolates from September 2007 – June 2010

- 7 stool samples

**Figure 1. Clusters and samples.** All clusters of cases occurred in the Oxford University Hospitals between July and October 2011, apart from MRSA cluster 2 where samples were obtained by the Health Protection Agency from an outbreak in southern England between July and September 2011. CDI, *C difficile* infection:  $\geq 3$  unformed stools in 24 hours, enzyme immunoassay-positive, culture-positive.
